# Supplementary material for: Phase II-like murine trial identifies synergy between dexamethasone and dasatinib in T-cell acute lymphoblastic leukemia
Source: PubMed Central journal article supplement — Haematologica. 2020 Mar 5;106(4):1056–66. doi: 10.3324/haematol.2019.241026 (PMC8018112; doi:10.3324/haematol.2019.241026), 2020-03-05
Supplement: 2019_241026-Disclosures_Contributions.pdf [file 2019_241026-Disclosures_Contributions.pdf]

Haematologica  
HAEMATOL/2019/241026  
Version 3

Phase II-like murine trial identifies synergy between dexamethasone  
and dasatinib in T-cell acute lymphoblastic leukemia

Yuzhe Shi, Melanie C. Beckett, Helen J. Blair, Ricky Tirtakusuma,  
Sirintra Nakjang, Amir Enshaei, Christina Halsey, Josef Vormoor, Olaf  
Heidenreich, Anja Krippner-Heidenreich, and Frederik W. van Delft

Disclosures: None.

Contributions: F.W.v.D., A.K.H., Y.S. designed the research; Y.S. performed the research; Y.S., M.C.B., H.J.B. O.H. and R.T. designed and performed the in vivo experiments; F.W.v.D., A.K.H. and Y.S. analyzed the data and wrote the paper; S.N. and A.E. performed the bioinformatics analysis; C.H. performed brain histology and imaging; J.V., O.H. and C.H. reviewed the manuscript.
