# Supplementary material for: Phase II-like murine trial identifies synergy between dexamethasone and dasatinib in T-cell acute lymphoblastic leukemia
Source: PubMed Central journal article supplement — Haematologica. 2020 Mar 5;106(4):1056–66. doi: 10.3324/haematol.2019.241026 (PMC8018112; doi:10.3324/haematol.2019.241026), 2020-03-05
Supplement: 2019_241026_SHI_SUPPL.pdf [file 2019_241026_SHI_SUPPL.pdf]

## Phase II-like murine trial identifies synergy between dexamethasone and dasatinib in T-cell acute lymphoblastic leukemia

Yuzhe Shi,<sup>1</sup> Melanie C. Beckett,<sup>1</sup> Helen J. Blair,<sup>1</sup> Ricky Tirtakusuma,<sup>1</sup>  
Sirintra Nakjang,<sup>1</sup> Amir Enshaei,<sup>1</sup> Christina Halsey,<sup>2</sup> Josef Vormoor,<sup>3</sup>  
Olaf Heidenreich,<sup>1,3</sup> Anja Krippner-Heidenreich<sup>3#</sup> and Frederik W. van Delft<sup>1#</sup>

<sup>1</sup>Wolfson Childhood Cancer Research Centre, Northern Institute for Cancer Research, Newcastle University, Newcastle upon Tyne, UK;  
<sup>2</sup>Wolfson Wohl Cancer Research Centre, Institute of Cancer Sciences, College of Medical, Veterinary and Life Sciences, University of Glasgow, Glasgow, UK and <sup>3</sup>Prinses Máxima Centrum voor Kinderoncologie, Utrecht, the Netherlands

*#AKH and FWvD contributed equally as co-senior authors.*

©2021 Ferrata Storti Foundation. This is an open-access paper. doi:10.3324/haematol.2019.241026

Received: October 21, 2019.

Accepted: March 4, 2020.

Pre-published: March 5, 2020.

Correspondence: *FREDERIK W. VAN DELFT* - frederik.van-delft@newcastle.ac.uk

---

## **T-ALL cell lines and Tissue Culture**

The cell lines used were available in-house, or kindly gifted by Dr M Mansour, UCL Cancer Institute, London, UK (ALL-SIL, CUTLL1, KOPTK1, MOLT16, DU.528, Loucy). All cell lines were authenticated before use. SUPT1, CUTLL1, MOLT4, Jurkat, HPB-ALL and CCRF-CEM were cultured in RPMI1640 with 10% fetal bovine serum (FBS; Thermofisher). HSB2, KOPTK1, ALLSIL, DU528 and MOLT16 were cultured in RPMI1640 with 20% FBS. 293T was cultured in DMEM with 10% FBS, 2 mM L-Glutamine and 1 mM Sodium Pyruvate (Sigma#S8636, Dorset, UK). The murine OP9-DL1 cell line was kindly provided by JC Zuniga-Pflucker, Toronto, Canada, and cultured in MEM $\alpha$  (ThermoFisher) with 10% FBS. Cell culture media and additives were obtained from Sigma unless stated otherwise.

## **Xenotransplantation of patient samples**

Patient-derived xenografts (PDXs) were harvested from the NOD.Cg-PrkdcscidIl2rgtm1wjl/SzJ (NSG, Charles River labs and bred in-house) mice after the engraftment of patient samples. PDXs were co-cultured ex vivo with OP9-DL1 in StemSpan Serum-Free Expansion Medium II (STEMCELL, UK) supplemented with human IL-7 (10 ng/ml) and SCF (100 ng/ml) (both PeproTech, UK).

## **Lentivirus Production and Cell Transduction**

Lentivirus was generated in 293T cells, seeding  $1 \times 10^6$  cells per 10 cm plate (Corning, USA) by co-transfection with a second-generation lentiviral vector pMD2.G and pCMV  $\Delta$ R8.91. For co-transfection, 5  $\mu$ g pMD2.G, 15  $\mu$ g pCMV  $\Delta$ R8.91 and 20  $\mu$ g of lentiviral vector were mixed to a final volume of 500  $\mu$ l containing 0.25 M CaCl<sub>2</sub>. This solution was slowly mixed with 500  $\mu$ l 2xHeBS (0.28 M NaCl, 0.05 M HEPES, 1.5mM Na<sub>2</sub>HPO<sub>4</sub>, pH 7.0) drop by drop. After thorough mixing, the mixture was left for 30-40 mins at room temperature. The 1 ml transfection mix was gently dropped onto a 293T monolayer of 25-35% confluency. On the 3rd day, after aspirating the 293T medium, the cells were carefully washed once with PBS and fresh cell culture medium was added. After culturing the cells for 72 hours, the supernatant containing lentivirus was harvested and filtered through a 0.45  $\mu$ m Syringe Filter (StarLab, UK).

The filtered supernatant of 293T containing the lentivirus was either added directly to T-ALL cells or concentrated prior to improve transduction efficiency. Lentivirus was centrifuged by ultra-centrifuge centrifugation (Beckman Coulter Optima XE-100, IN, USA) at 26,500 x g for two hours and re-suspended in an appropriate volume of 100ul – 1 ml cell culture medium. Cells were seeded in 48-well plates at  $1 - 2 \times 10^6$  cells per well and transduced in presence of 0.1% polybrene (8  $\mu$ g/ml) by spinfection at 900 x g for 50 mins. After spinfection the cells were cultured and the next day the majority of the lentiviral and polybrene containing supernatant was removed from the cells, before addition of fresh media and transfer of cells to a 24-well plate. 5 - 6 days post transduction, the transduction efficiency was measured by flow cytometry.

## **Targeted shRNA Screen**

A library of short hairpin RNA (shRNA) targeting PTCRA, LCK, FYN, ZAP70, CD3E and LAT was generated using the pLKO5d.SFFV.eGFP backbone (kindly provided by Dirk Heckl and Jan-Henning Klusmann, MHH Hannover<sup>1</sup> (Supplementary Table S3). Positive and negative controls comprising 18 shRNAs were selected based on in-house shRNA screens in a variety of cancers. ShRNA oligonucleotides (Sigma-Aldrich, UK) were annealed by heating to 95°C for 5 min and slow cooling to room temperature. ShRNA oligonucleotides were ligated into the Bsm1 restriction enzyme site of pLKO5d.SFFV.eGFP vectors. Sequences were verified using Sanger sequencing (Source Bioscience, UK).

T-ALL cell lines and PDX cells were transduced to an  $MOI \leq 0.3$ . In PDX LK203 and L963, a transduction efficiency of 7% and 3% respectively was obtained. Samples were collected at baseline, day 16, 30 and 40 for the *in vitro* screen and at baseline and endpoint for the *in vivo* screen. Cells were intrafemorally injected into NSG mice and harvested once mice began to exhibit clinical signs. Genomic DNA (gDNA) was extracted using the DNeasy Blood & Tissue Kit (Qiagen, UK) and quantified by Nanodrop ND-1000 (Thermo Scientific, UK), after which 825 ng was amplified with barcoding primers (Supplementary Table S2) by 30 cycles of PCR using Phusion Hot Start II DNA Polymerase (ThermoFisher#F549L, Paisley, UK). The resulting amplicons were sequenced by next generation sequencing (NGS) (Illumina MiSeq) at Newcastle University Genome Core Facility and analyzed by the Bioinformatic Support Unit (Supplementary Table S1 and S2).

### **Next Generation Sequencing and analyses**

Raw sequencing reads were trimmed at both ends up to the locations of barcode sequence before aligning to the reference shRNA barcodes using Bowtie2<sup>2</sup> with a zero mismatch tolerance. An in-house script was used to extract read counts from aligned sequence files. Differential representation analyses of aligned read counts from different screen datasets were performed as described in Dai et al. using edgeR<sup>3,4</sup>. In brief, read counts were normalized to adjust for library size differences across samples. The likelihood ratio test method based on generalized linear models (GLM) framework in edgeR was used to test for differential representation of shRNA barcodes.

For screen data from cell lines, time-course differential representation analysis with replicates was performed in order to identify shRNAs with changes in their abundance over time (days 0, 16, 30 and 40). The analysis was performed for each cell line independently. Depletion of shRNAs over time was allocated a negative slope of the regression line, whereas enrichment of shRNAs was allocated a positive slope.

For the primograft LK203 *in vitro* screen dataset, we treated samples from different time points (day 16 and day 30 with/without mesenchymal stem cell MSC) as non-baseline samples and tested for differential representation between the baseline samples and non-baseline samples.

To control for unwanted variation (e.g. biological, technical) between samples derived from the *in vivo* screen dataset, the RUVg approach was employed to estimate factors of unwanted variation under the assumption that our negative controls (i.e. non targeted control (NTC) and shRNA targeting RUNX1/ETO) had constant representation across samples<sup>5</sup>.

To adjust for this unwanted bias, the estimated factors of unwanted variation as well as the covariate of interest were both included in the model for differential representation analysis which was performed on upper-quartile normalized counts using the GLM approach from edgeR as described above. In this dataset, we tested for differential representation between baseline samples and samples either from spleen or bone marrow separately.

### **Flow cytometry**

For PhosFlow,  $1 \times 10^6$  cells were washed with cold PBA (PBS, 1% BSA and 0.05%  $NaN_3$ ), fixed in Cytofix Fixation Buffer (BD Bioscience) for 15 mins at 37°C, washed and permeabilized in PermBuffer III (BD Biosciences) for 30 mins on ice. For control and specific staining, mouse serum (Sigma Aldrich#M5905), PE-IgG1 control (R&D#IC002P, clone 11711), Alexa Fluor 647-IgG control (Biolegend#400130, clone MOPC-21), Alexa Fluor 647-LCK (BioLegend#628303, clone LCK-01) and PE-Src (Y418) (BD Biosciences#560094, clone K98-37) were used.

Cell cycle analysis was performed using propidium iodide or Hoechst 33342 (both Sigma Aldrich). Apoptosis assay was performed using PE-Annexin V/7-AAD (BD Biosciences) as per manufacturer's instructions or APC-Annexin V (Biolegend)/LIVE-DEAD Fixable Aqua (ThermoFisher).

Peripheral leukemia engraftment was assessed by incubating mouse blood with APC-huCD45 (HI30), PE-huCD7 (M-T701) and BV421-mCD45 (30-F11) (all from BD Biosciences) for 20 mins in the dark. Red cells were lysed using freshly prepared lysis buffer (155 mM NH<sub>4</sub>Cl, 12 mM NaHCO<sub>3</sub>, 0.1 mM EDTA) for 10 mins. Cells were stained for cell viability with LIVE/DEAD Fixable Aqua prior to fixation in 2% paraformaldehyde.

For PDX proliferation assays, PDXs were incubated with 5 μM Cell Trace Violet (CTV) (ThermoFisher#C34571, Paisley UK) for 20 mins at 37°C. Cell loading was stopped using FBS (10% final), cells were washed in PBS and reseeded in SFEM II medium with OP9-DL1 cells. Two weeks later, cells were separated from feeder cells by repetitive transfer of leukemic cells. BD FACSCanto™ II was used to assess CTV distribution at the excitation/emission of 405/450. Flow cytometry was performed on BD Calibur or BD LSRFortessa™ X-20 Attune NxT (ThermoFisher) and raw data were analysed by Flowjo (v10, Oregon, USA).

### **Competitive Assay**

*In vitro* T-ALL cells ( $1 \times 10^6$ ) were transduced with shRNA viral supernatant (500 μl). Transduction efficiency as demonstrated by GFP expression was determined at day 6. Five million cells were equally mixed with parental cells to generate approximately 50% GFP expression. Cells were kept in fresh medium and the GFP expression was assessed every three days. A relative GFP expression of 1 denotes a mixture of 50% GFP+ cells with 50% parental cells (ratio 1:1). Graphs were generated by using GraphPad Prism (version 6, CA, USA).

For the *in vivo* competitive assay MOLT4 cells were transduced with either pLKO5RFP657-shNTC (kindly provided by O Heidenreich) or GFP-shLCK#3 (see section Targeted shRNA screen). The cells were then mixed to give a 1:1 ratio of RFP : GFP.  $1 \times 10^7$  cells were injected into 5 NSG mice. 26 days post injection mice showed signs of ill health and were humanely killed. Samples were collected from bone marrow, spleen and liver. Flow cytometry determined RFP and GFP ratio of leukemia cells after propagation *in vivo*.

### **SDS-PAGE and Western Blot**

Proteins of whole cell lysates in Laemmli buffer (32.9 mM Tris-HCl pH 6.8, 13.15% glycerol, 1.05% SDS, 0.005% bromophenol blue) were separated by SDS-PAGE and transferred onto Polyvinylidenedifluoride membranes (Merck Millipore). The following primary antibodies were used: LCK (#2984, clone D88), p-SRC (Tyr416) (#6943, clone D49G4), p-LCK (Tyr505) (#2751), p-PLCγ1 (Tyr783) (#2821), PLCγ1 (#5690, clone D9H10) (all purchased from Cell Signalling), GAPDH (Cat#5G4, clone 6C5, Hytest, Finland) and Clathrin. Secondary antibodies were from Dako (CA, USA): Goat Anti-Mouse IgG HRP (P0447), Goat Anti-Rabbit IgG (P0448). For developing Immobilon Western Chemiluminescent HRP Substrate (Millipore) and the ChemiDoc MP Imaging System with Image Lab Software (Bio-Rad) has been used.

### **RNA extraction and quantitative real-time PCR**

RNA was extracted from  $5 \times 10^6$  cells using the RNeasy Mini Kit (Qiagen, UK). Briefly, cells were collected at 500 x g for 3 mins and lysed in RLT buffer with 1% β-mercaptoethanol. The cell lysates were transferred to a QIAshredder column and centrifuged at 8,000 x g for 2mins. The flow-through was mixed with 70% Ethanol and moved to the RNeasy mini-spin column. After the centrifugation, the

flow-through was discarded, and the column was washed twice with RW1 and RPE buffer respectively. Finally, the column was dried off by centrifugation at maximum speed for 2 mins. The RNA was dissolved in RNase-free water and eluted from the column by centrifugation at 8,000 x g for 2 mins.

The cDNA was synthesized according to manufacturer's protocol by RevertAid H Minus First Strand cDNA Synthesis Kit (Thermo scientific#1631, Paisley, UK). The primers for qRT-PCR (Supplementary Table S3) were ordered from Sigma Aldrich (Dorset, UK). Samples were run on Applied Biosystems ViiA 7 (ThermoFisher, Paisley, UK). Relative mRNA expression was expressed as 2-DCt.

### **Bioinformatics analysis Drug matrix synergy**

The threshold analysis of log Dexamethasone was used to identify the optimum threshold for this drug. We have started from the minimum value (-3) and maximum value (7) and added or subtracted one unite at the time respectably. Similar method was used to access the optimum threshold of Dasatinib. This time for the minimum value (-13) and maximum value of (4). The proportion significance of cases within the threshold and synergy was calculated using fisher's exact test.

### **Xenotransplantation experiments**

Mice used in this project were bred and housed in the Newcastle University Comparative Biology Centre under specific pathogen-free conditions. A flow hood (FASTER S.r.l, Cornaredo (MI), Italy) was used for sterilized manipulations or experiments. All mouse work was approved and followed Home Office Project License PPL60/4552 and carried out by researchers with Home Office Personal License under the Animal (Scientific Procedures) Act 1986. All mice were humanely killed by a schedule 1 method when they exhibited endpoints as specified by the license. For example, when tumors reached 1.5 cm in diameter, if they lost > 10% weight compared to controls for 3 consecutive days or 20% at any time, or displayed signs of ill health.

### **Mouse Toxicity Studies**

A pilot toxicity study in a small number of NSG mice was carried to explore the maximal tolerant dosing of dasatinib in combination with 1 mg/kg dexamethasone. Six healthy mice (three males and three females) were dosed daily (Monday to Friday) with one dosing of combined 1 mg/kg dexamethasone and dasatinib by intraperitoneal (IP) injection. Mice were examined and weighed daily upon the drug administration. The starting dose of dasatinib was 5 mg/kg. Later the dose increased to 10 mg/kg, 20mg/kg and 35mg/kg for the highest dose. The initial drug was dissolved in DMSO stock and subsequently diluted down in water. On the 3rd week of combination of 1 mg/kg dexamethasone and 35 mg/kg dasatinib, all six mice lost 10-15% of weights indicating that they could not tolerate this dose any more. Dosing was stopped and the weights were monitoring continuously for 10 days. Mice gain weights gradually afterwards and were back to their original weights. The maximal tolerant dosing for NSG mice is 35 mg/kg dasatinib with 1 mg/kg dexamethasone for three weeks.

### **Harvesting of Leukemic Cells from Mice**

Spleen samples were homogenized through a cell strainer and bone marrow samples were harvested by flushing the lumens with PBS or crushing bones with a pestle and mortar with PBS.

### **Histological examination of murine heads**

Murine heads were stripped of soft tissues and decalcified in Hilleman and Lee EDTA solution (5.5% EDTA in 10% formalin) for 3 weeks, then trimmed and put in fresh EDTA for 4 days. Samples were processed on a Tissue-Tek VIP processor using a routine overnight 17.5 hour cycle. Following paraffin wax embedding, 2.5µm sections were cut onto Poly-L-silane coated slides. Sections were then stained

with Gill's haematoxylin and Putt's eosin (both made in house). Quantification of CNS infiltration was performed using a Hamamatsu Nanozoomer Digital Pathology slide scanner with digital slide management/image analysis software from Slidepath (Dublin). CNS infiltration was evaluated as previously described <sup>6</sup>, the maximal depth of CNS infiltrates was measured across 5 equally spaced brain sections per mouse and then averaged, all treatment allocations were blinded to the investigator performing the measurements.

## References

1. Adams FF, Heckl D, Hoffmann T, et al. An optimized lentiviral vector system for conditional RNAi and efficient cloning of microRNA embedded short hairpin RNA libraries. *Biomaterials*. 2017;139:102-115.
2. Langmead B, Salzberg SL. Fast gapped-read alignment with Bowtie 2. *Nat Methods*. 2012;9(4):357-359.
3. Dai Z, Sheridan JM, Gearing LJ, et al. edgeR: a versatile tool for the analysis of shRNA-seq and CRISPR-Cas9 genetic screens. *F1000Res*. 2014;3:95.
4. Robinson MD, McCarthy DJ, Smyth GK. edgeR: a Bioconductor package for differential expression analysis of digital gene expression data. *Bioinformatics*. 2010;26(1):139-140.
5. Risso D, Ngai J, Speed TP, Dudoit S. Normalization of RNA-seq data using factor analysis of control genes or samples. *Nat Biotechnol*. 2014;32(9):896-902.
6. Irving J, Matheson E, Minto L, et al. Ras pathway mutations are prevalent in relapsed childhood acute lymphoblastic leukemia and confer sensitivity to MEK inhibition. *Blood*. 2014;124(23):3420-3430.

# Supplementary Figures

A

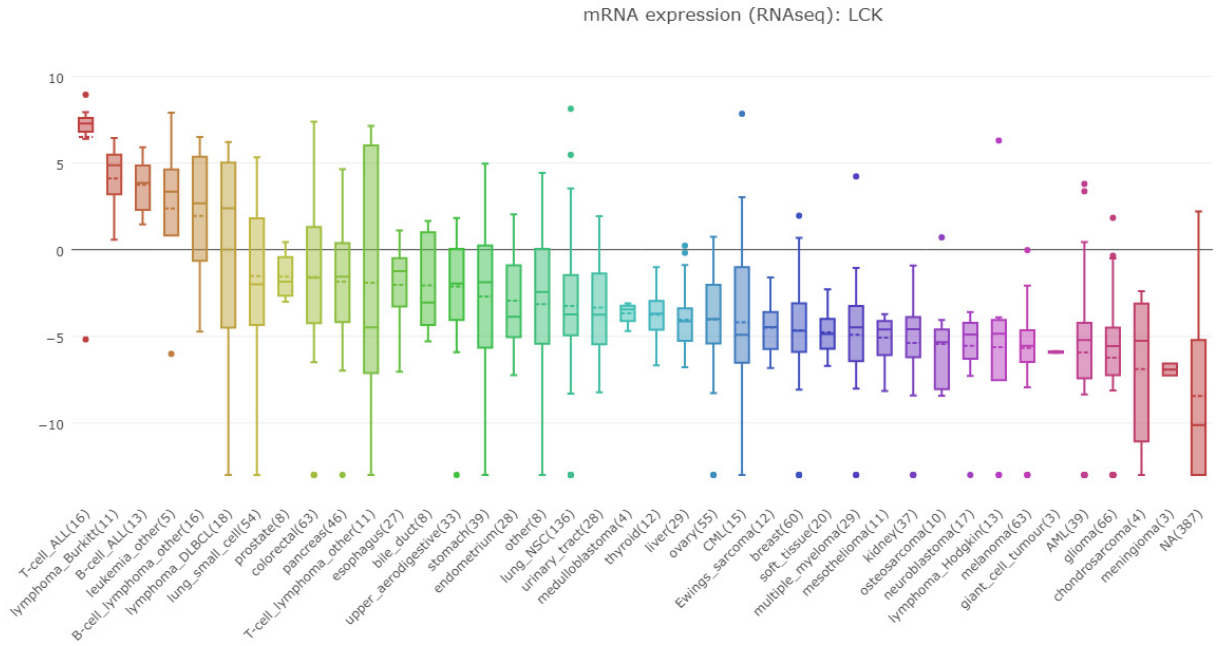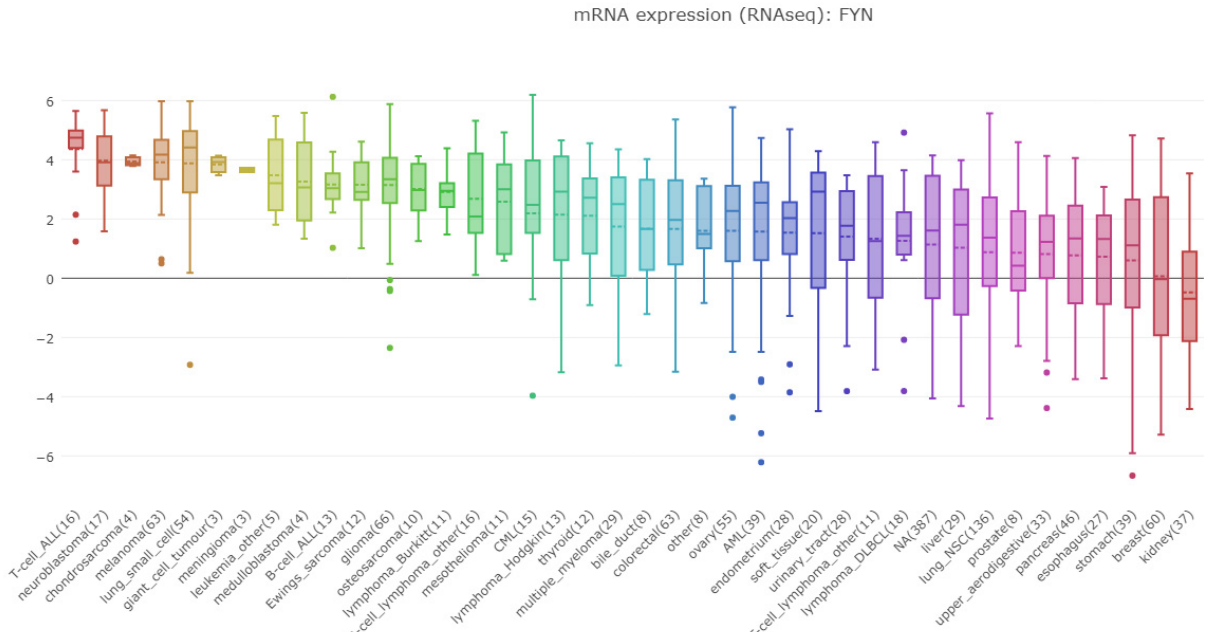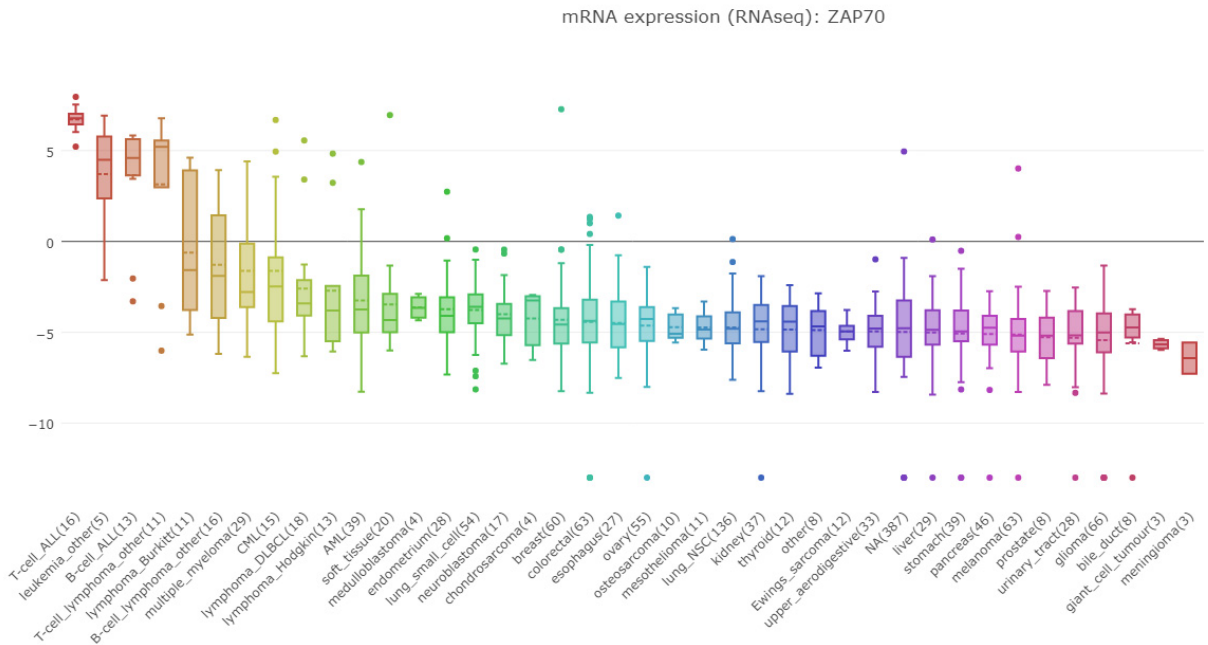

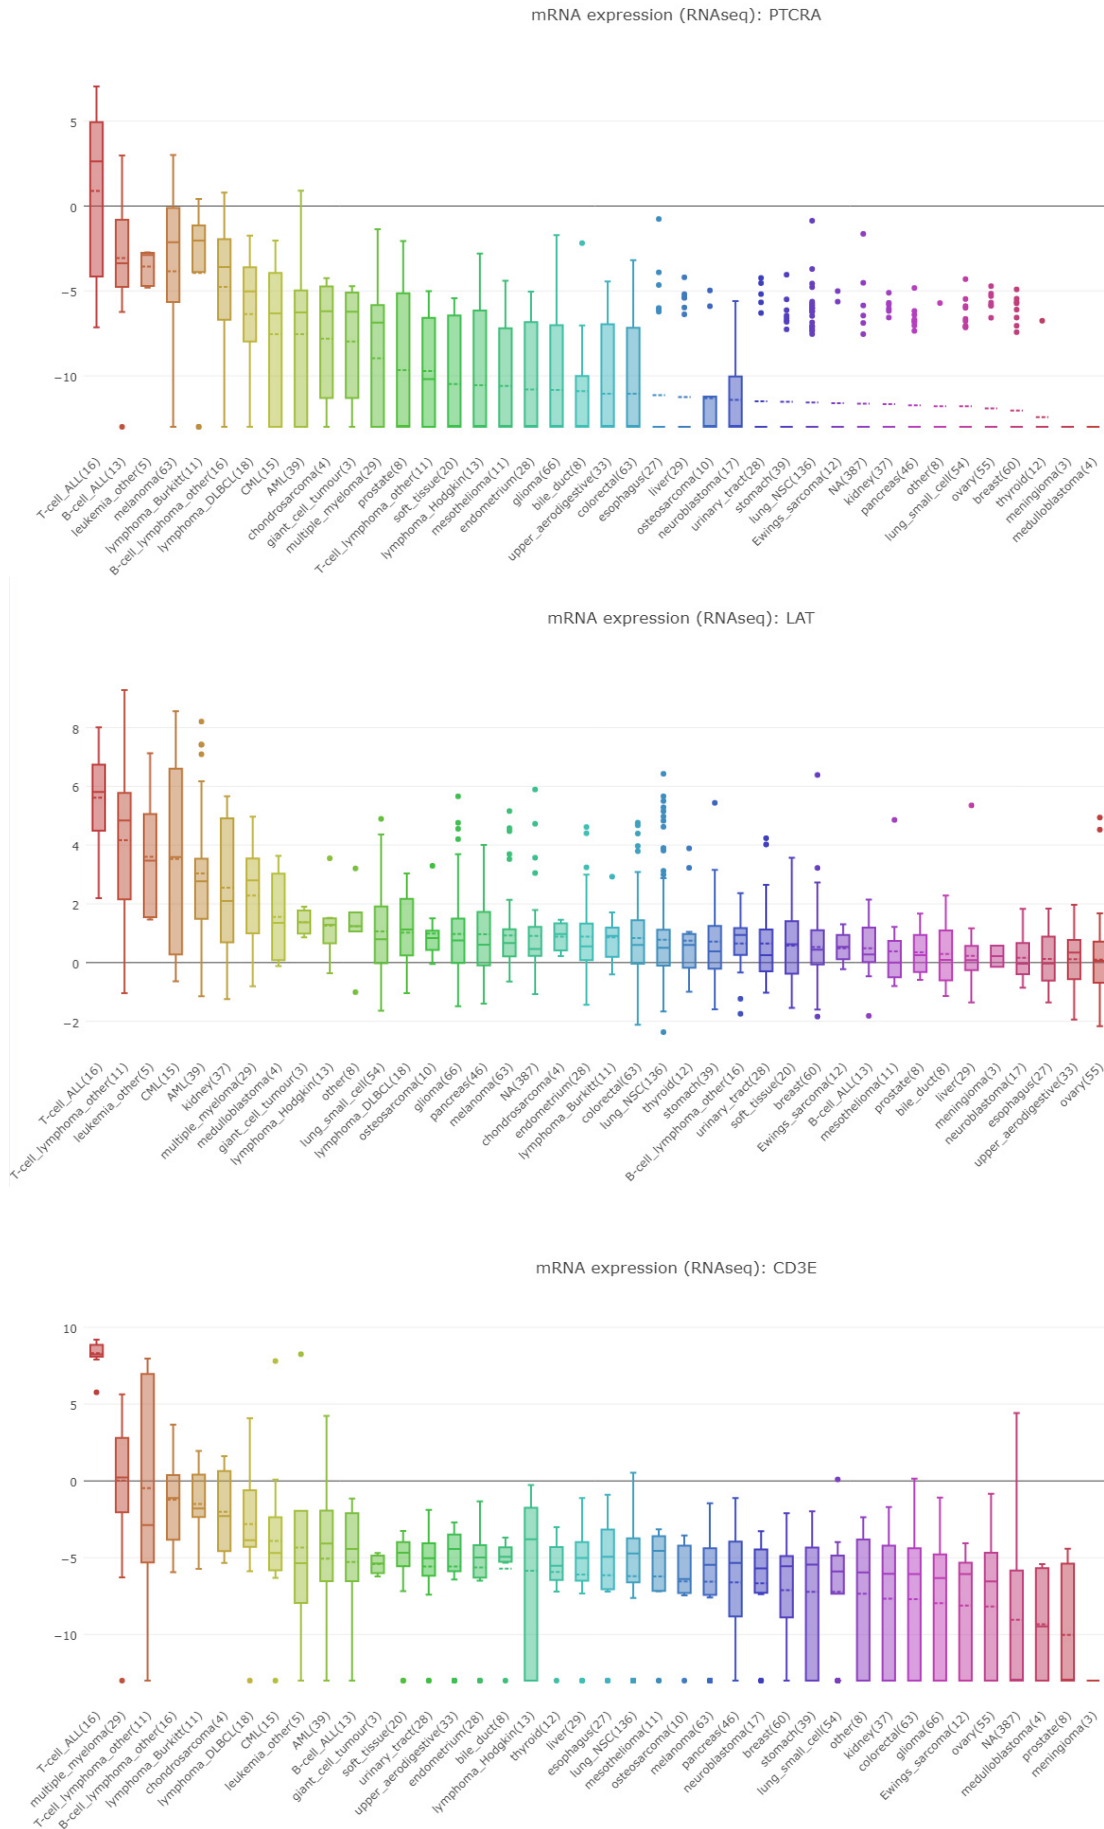

**Supplementary Figure 1A. Relative gene expression of targets in the shRNA screen.** *In silico* analysis, using the Cancer Cell Line Encyclopedia (CCLE), of gene expression of *LCK*, *FYN*, *ZAP70*, *PTCRA*, *LAT* and *CD3E* in a panel of cancer cell lines.



B

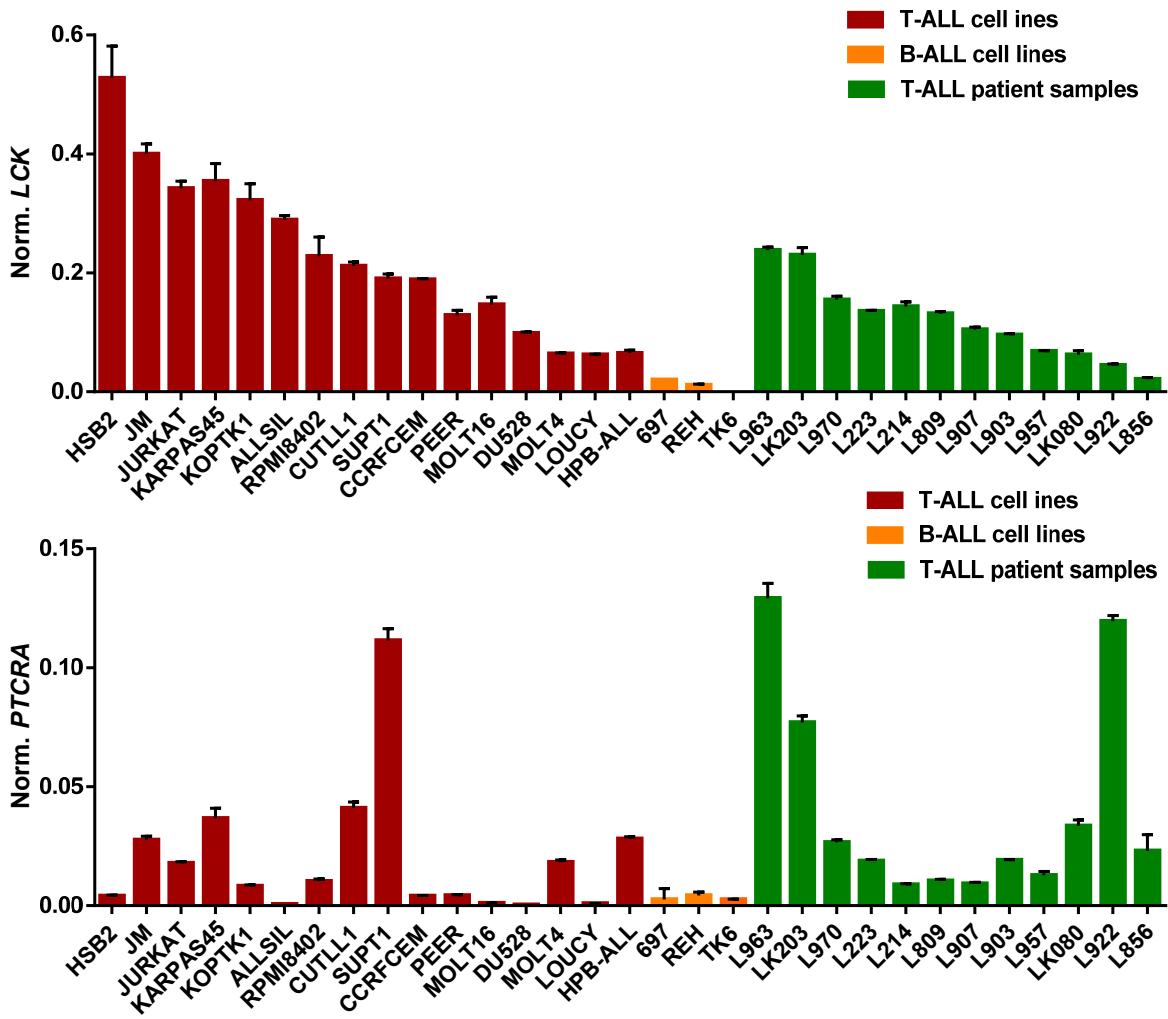

**Supplementary Figure 1B. Relative gene expression of *LCK* and *PTCRA* in a panel of cell lines and PDX samples.** *LCK* and *pTCRA* expression was determined in various T-ALL cell lines, 697 and REH (B-lineage ALL cell lines) and TK6 (lymphoblastoid cell line) by real time qPCR. *GAPDH* served as reference gene for normalization.

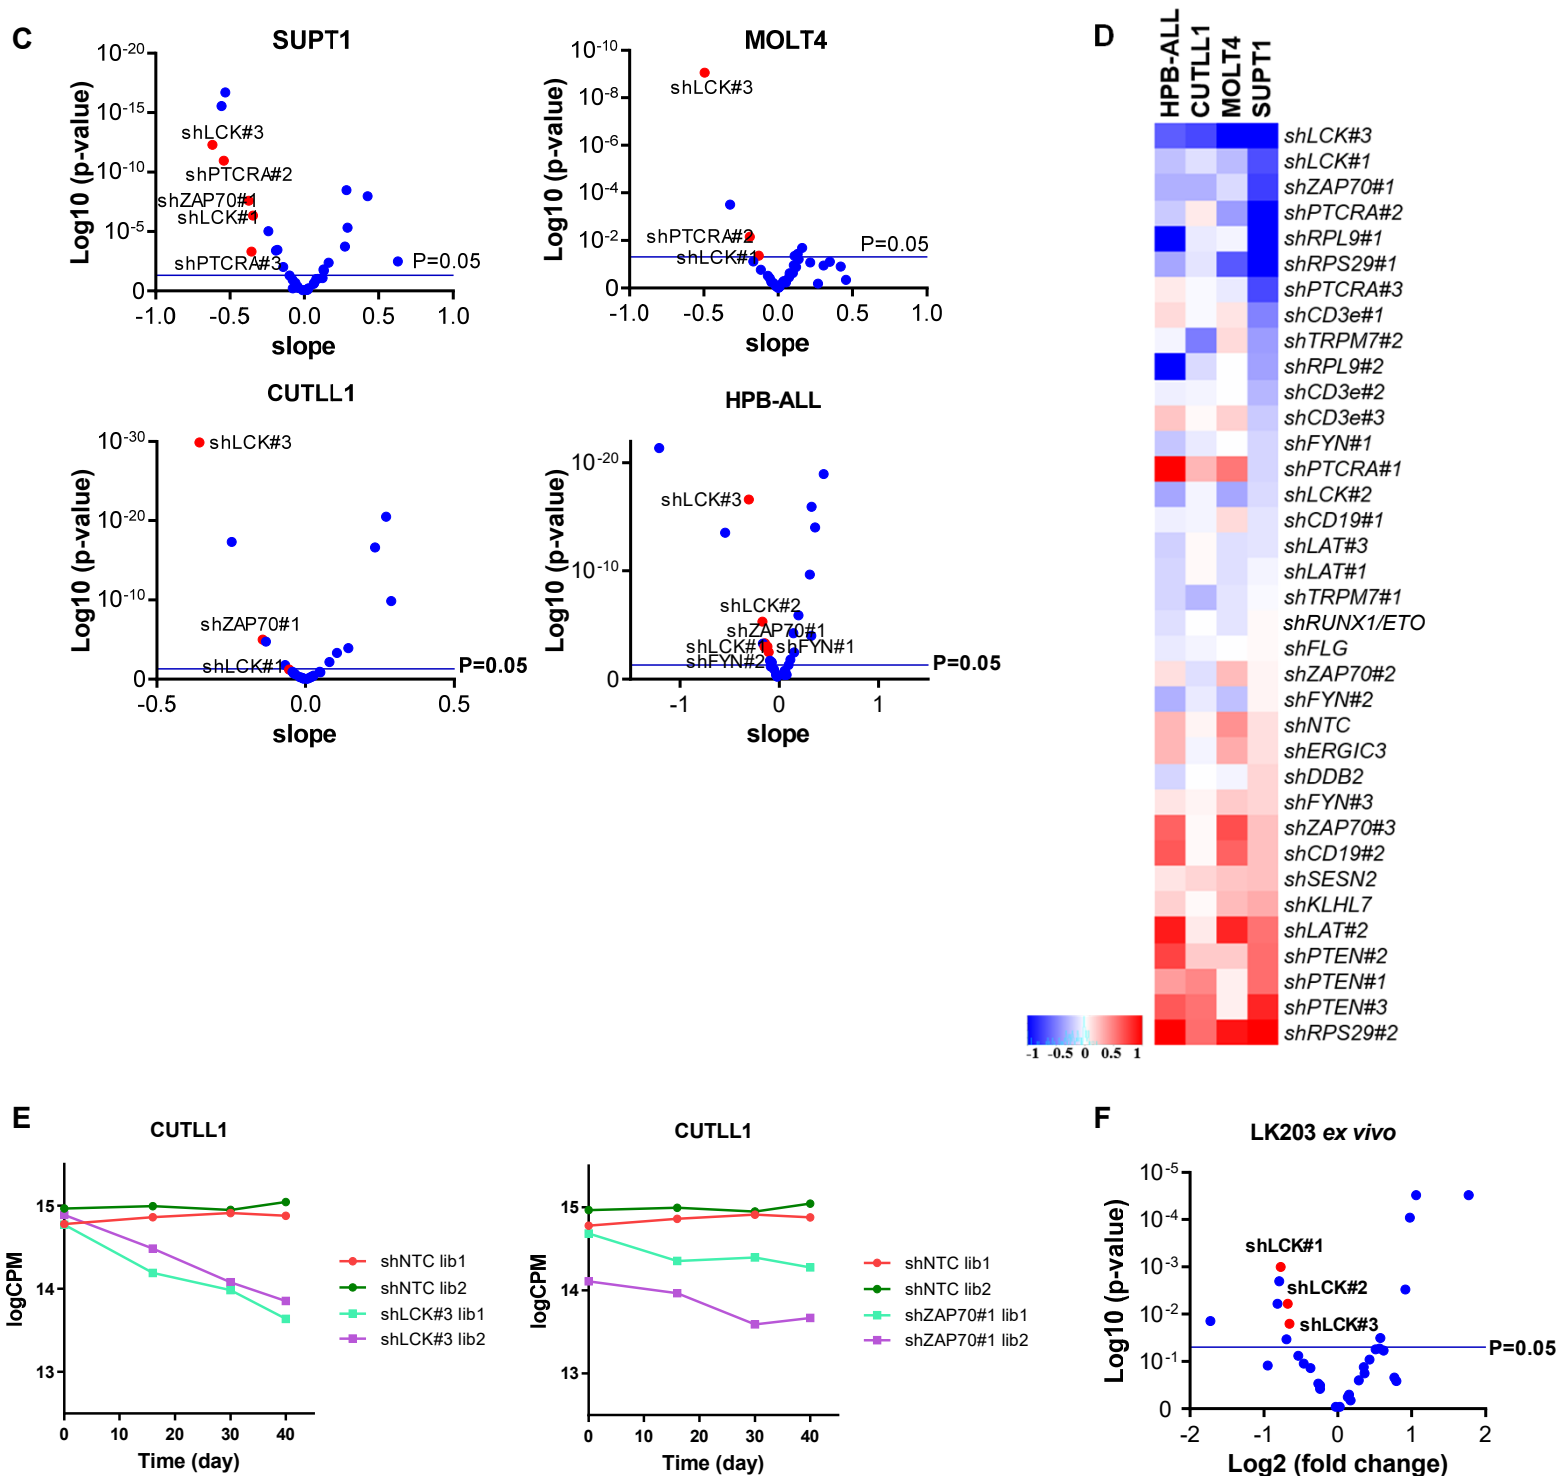

**Supplementary Figure 1C-F. Gradual depletion of shLCK#3 in T-ALL cell lines and PDX LK203 *ex vivo*.** Cells were lentivirally transduced with the pLKO5-shRNA library and the abundance of shRNAs were determined after 40 days (T-ALL cell lines) and 30 days (PDX LK203) growth *ex vivo*. (C) Volcano plots representing the change in shRNA representation over time (slope, x-axis) with negative values representing depletion. The y-axis represents the significance in enrichment or depletion of shRNA constructs (log<sub>10</sub> scale). Each dot represents an individual shRNA construct. Dots above the blue line have significantly changed ( $p < 0.05$ ). (D) Heatmap depicting relative representation of shRNA constructs after *in vitro* culture of 4 T-ALL cell lines (40 days). (E) Change in shRNA representation (logCPM) over time (days) for NTC (red, green), LCK and ZAP70 (lib 1 blue, lib 2 purple). shRNA derived from library 1 or 2. (F) Volcano plot representing the magnitude of the fold change (log<sub>2</sub>) in shRNA abundance derived from PDX LK203 leukemia cells on the x-axis. Each dot represents an individual shRNA construct. The y-axis represents the significance in enrichment or depletion of shRNA constructs (log<sub>10</sub> scale). Dots above the blue line are significantly depleted ( $p < 0.05$ ).

G

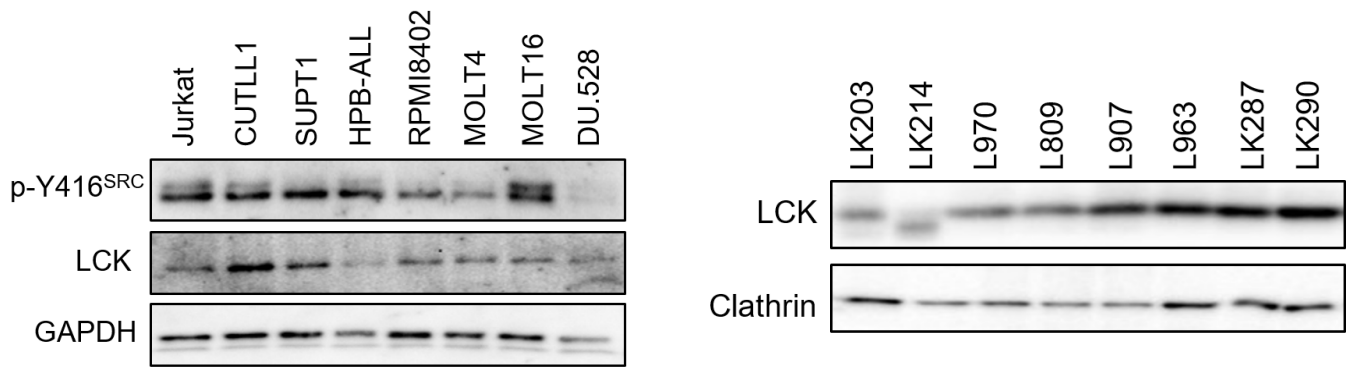

**Supplementary Figure 1G. LCK protein expression in T-ALL.** Western Blot analysis of LCK and p-Y416<sup>SRC</sup> protein expression in a panel of cell lines (left) and PDX samples (right). Comparative expression of housekeepers GAPDH and Clathrin is shown.

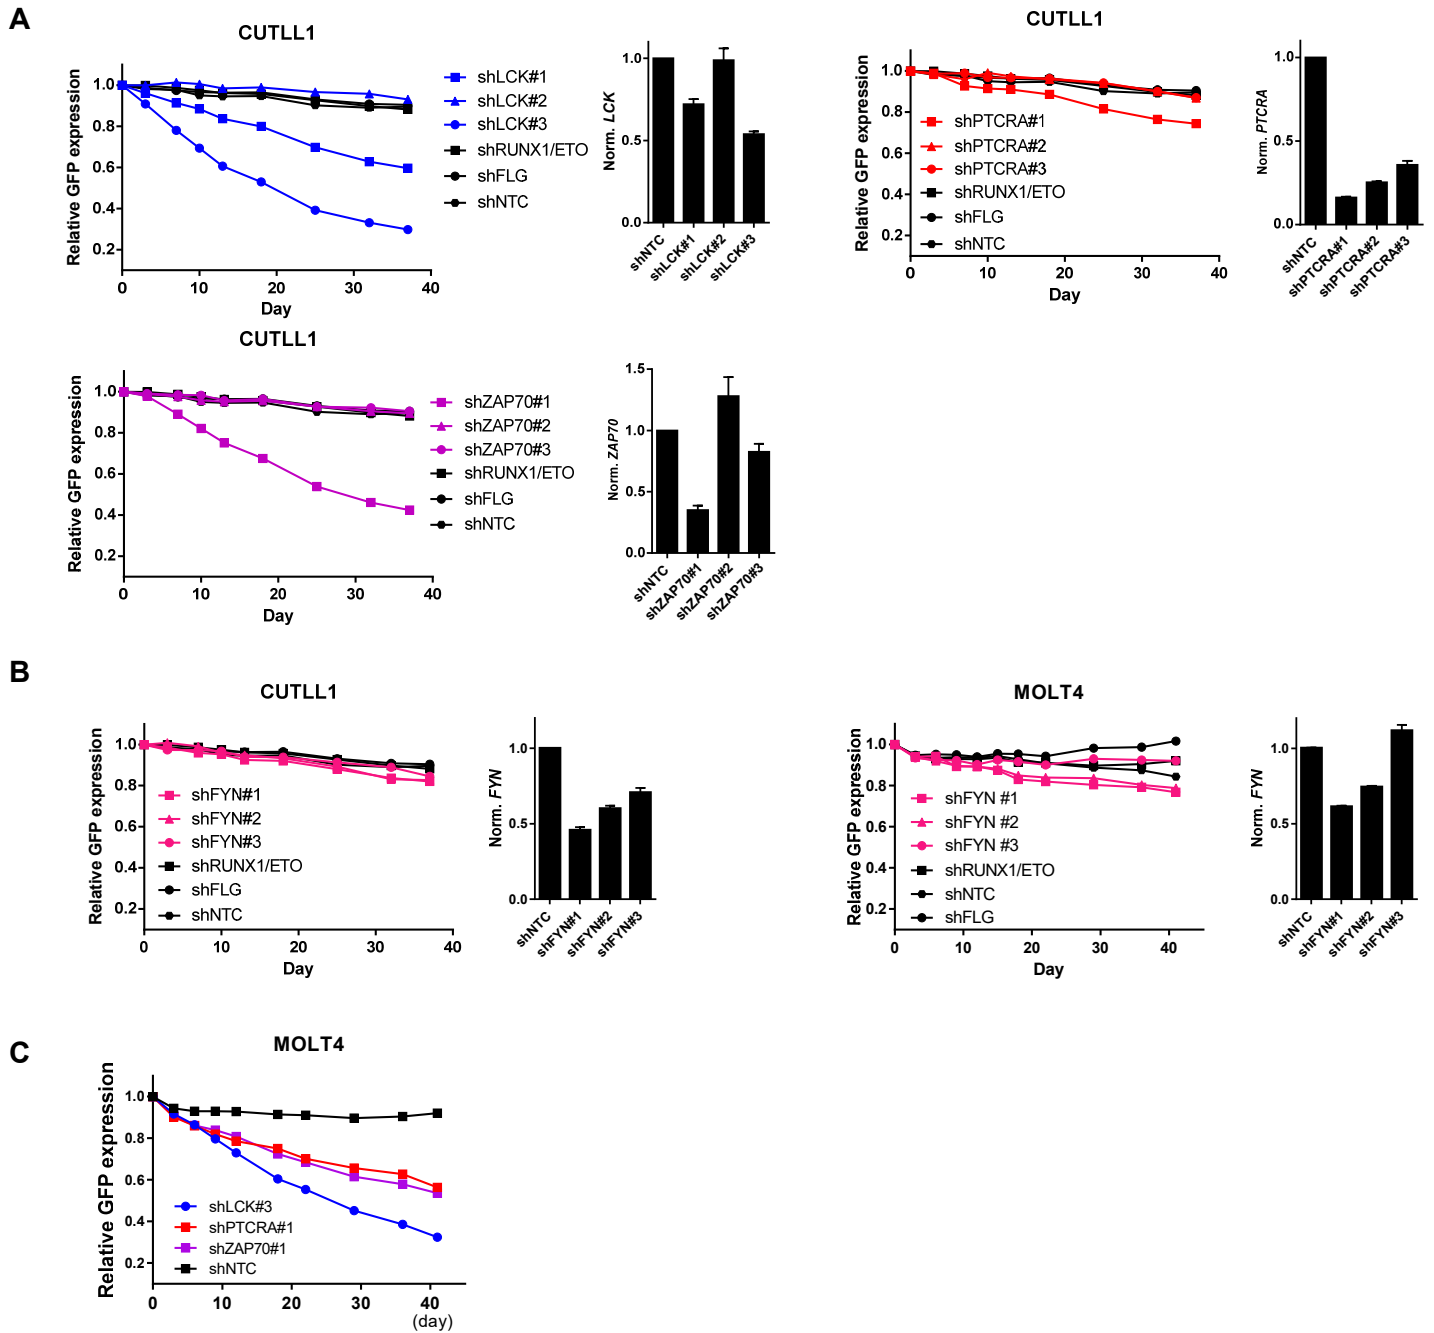

**Supplementary Figure 2. Competitive assays underline a critical role for LCK in T-ALL cell proliferation.**

(A) T-ALL cell line CUTLL1 was transduced with GFP expressing shLCK (blue), shZAP70 (purple), shPTCRA (red) or shNTC (black; RUNX1/ETO, FLG, NTC) expressing constructs. The cells were seeded in a 1:1 ratio with non-transduced parental cells *in vitro*. Cells were cultured and analyzed repetitively for the presence of GFP+ cells over a time period of 40 days. A relative GFP expression of 1 denotes a mixture of 50% GFP+ cells with 50% parental cells (ratio 1:1). A value of 0.5 means GFP+ cells represent 25% of total cells (ratio 1:4). Three separate shRNAs (#1,2,3) were used to target LCK, PTCRA and ZAP70. The knockdown efficiency at mRNA level is indicated in black bars on the right side of each proliferation plot. (B) CUTLL1 and MOLT4 cells were transduced with GFP expressing shFYN (pink) or shNTC (black) constructs and seeded in a 1:1 ratio with non-transduced parental cells *in vitro*. Cells were cultured and analyzed repetitively for the presence of GFP+ cells over a time period of 40 days. The knockdown efficiency at mRNA level is indicated in black bars on the right side of each proliferation plot. (C) MOLT4 cells were lentivirally transduced with shNTC (non-targeting control), shLCK#3 (blue), shPTCRA#1 (red), or shZAP70#1 (purple) expression constructs and seeded in a 1:1 ratio with non-transduced parental cells *in vitro*. Cells were cultured and analyzed repetitively by flow cytometry for the presence of GFP+ cells over a time period of 40 days.

**A**

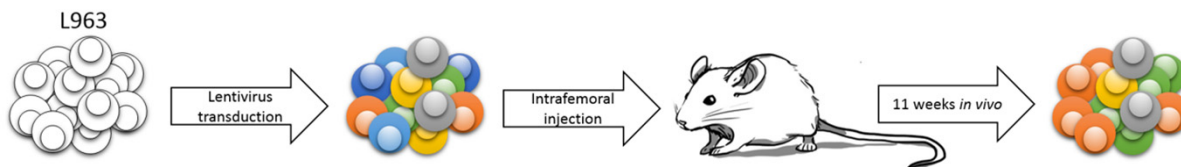

**B**

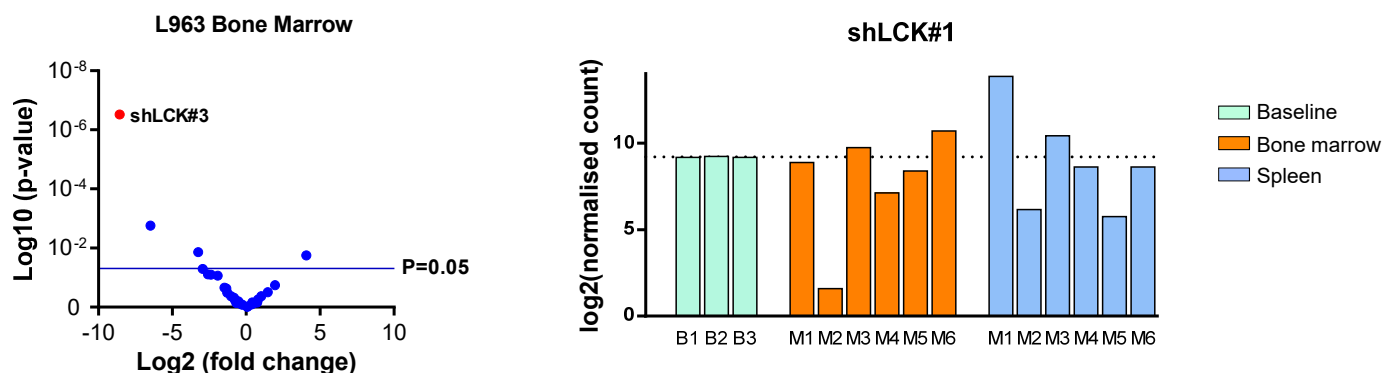

**C**

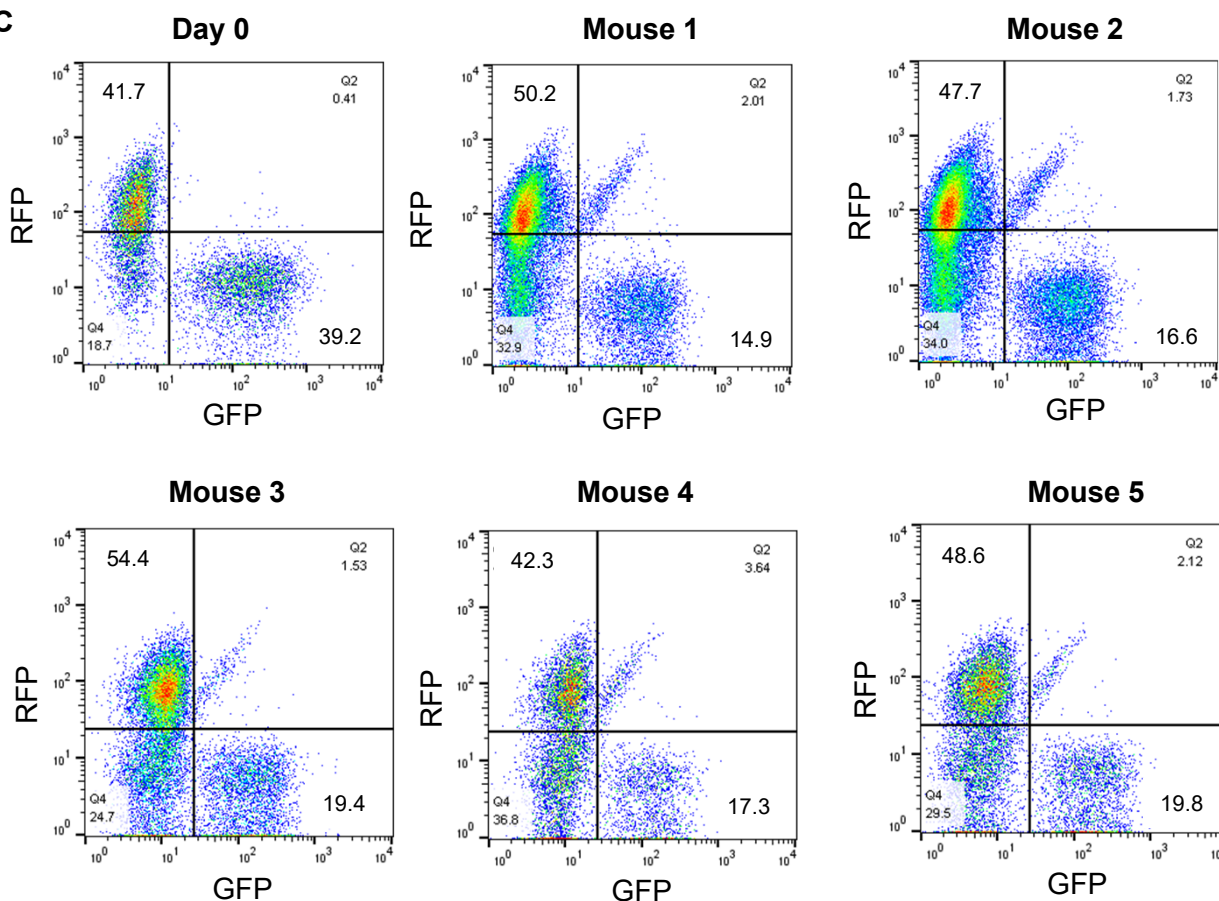

**Supplementary Figure 3. Targeted shRNA screen identifies critical role for LCK in T-ALL progression in immunocompromised NSG mice.** (A) Schematic representation of the *in vivo* targeted shRNA screen. (B) Volcano plot representing the magnitude of the fold change ( $\text{log}_2$ ) in shRNA abundance in PDX L963 bone marrow on the x-axis. shLCK#3 (red dot) represents the shRNA construct with most significant depletion in bone marrow. Bar plot of the normalized shLCK#1 sequencing reads ( $\text{log}_2$ ) in leukemic cells derived from the bone marrow (orange) or spleen (blue) of 6 individual mice (M1-6), relative to the frequency of these reads before transplantation (green, base line B1-3). (C) Flow cytometric analysis of representation of shNTC (red fluorescent protein, RFP) or shLCK#3 (GFP) constructs in MOLT4 *in vivo* competitive outgrowth assay. MOLT4 cells were derived from splenic tissue.

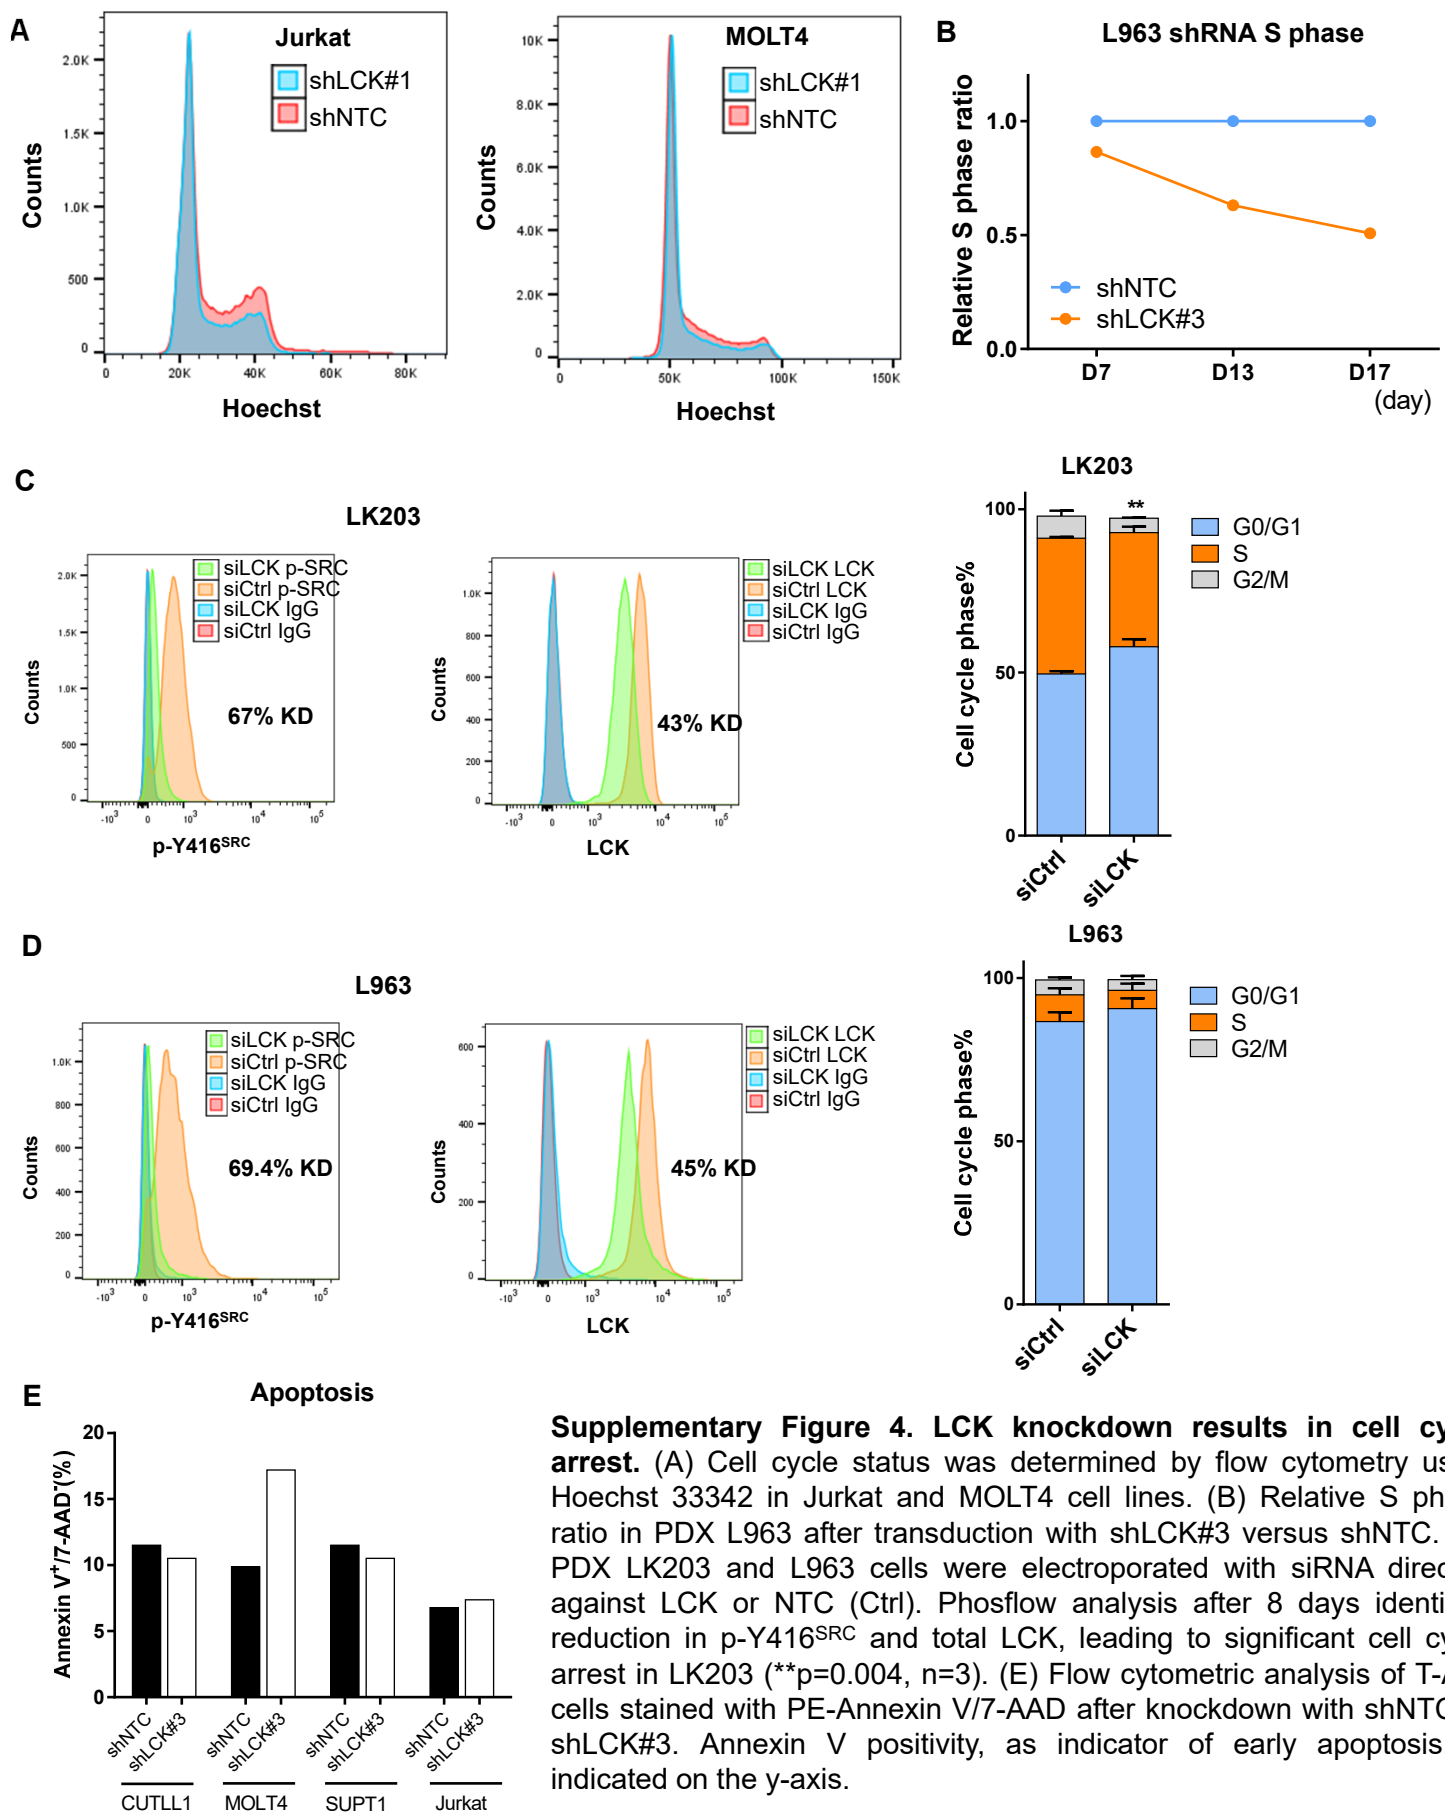

**A**

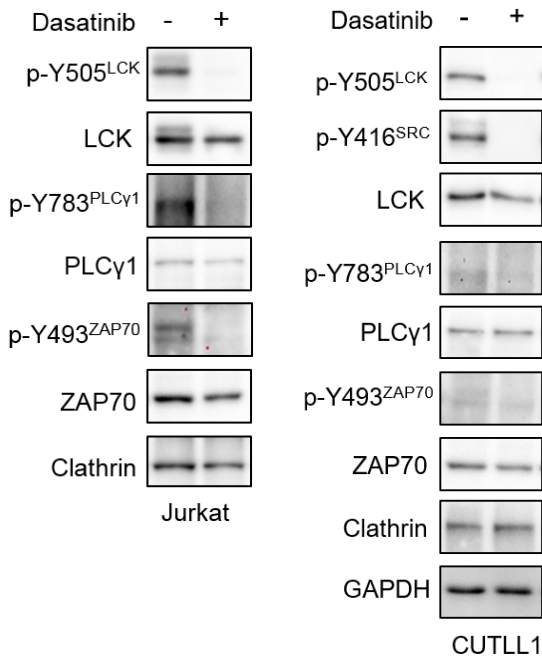

**B**

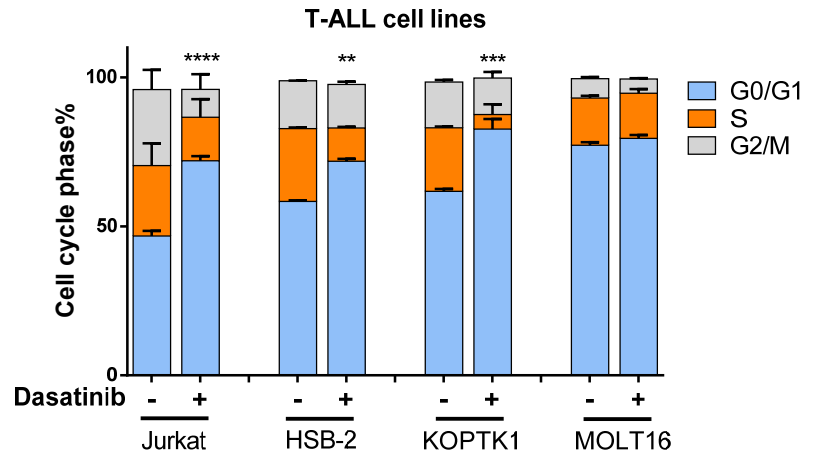

**C**

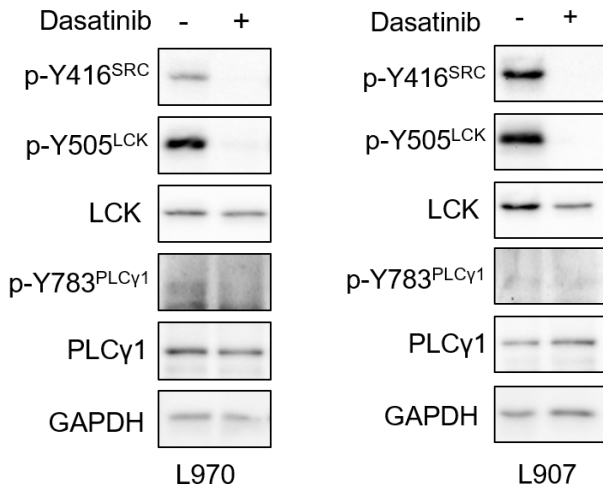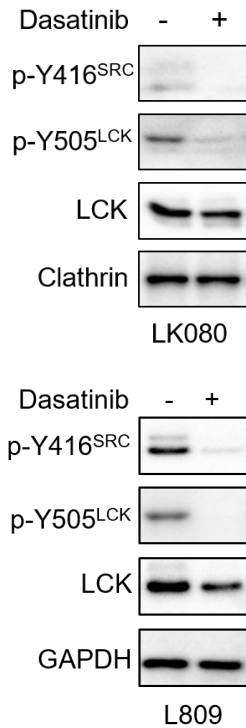

**D**

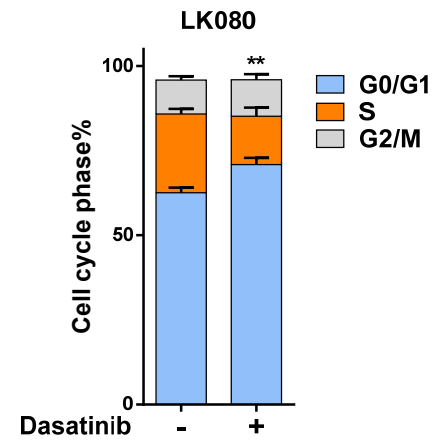

**E**

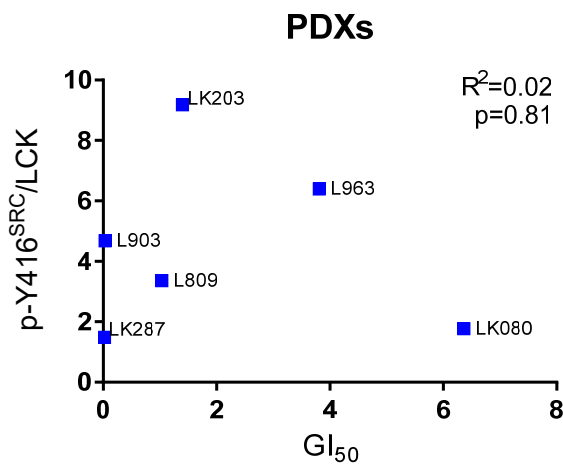

**Supplementary Figure 5. DAS inhibits LCK function and causes cell cycle arrest.** (A-D) Indicated T-ALL cell lines (A, B) or PDX T-ALL (C-D) were treated with vehicle control or DAS (2  $\mu$ M for cell lines, 1  $\mu$ M for PDXs) for 24 h. Phosphorylation of total LCK, p-Y416<sup>SRC</sup>, p-Y505<sup>LCK</sup>, total PLCγ1, p-Y783<sup>PLCγ1</sup>, total ZAP70 and p-Y493<sup>ZAP70</sup> was assessed in Jurkat or CUTLL1 cells (A) and in PDX L970, L907, LK080 and L809 (C) by Western Blot analysis. (B and D) Cell cycle was analysed after Hoechst staining and flow cytometric assessment in various T-ALL cell lines (B) and PDX LK080 (\*\*p=0.0049, n=3) (D). (E) The *in vitro* sensitivity of a panel of PDX samples to DAS ( $GI_{50}$ ) was correlated with the ratio of p-Y416<sup>SRC</sup> / total LCK as determined by Phosflow.

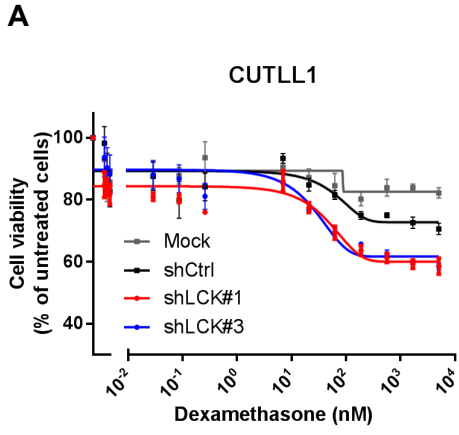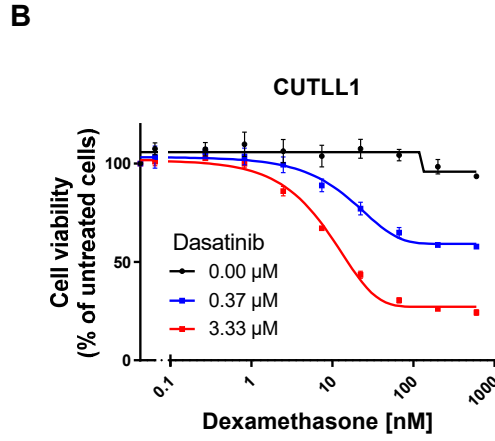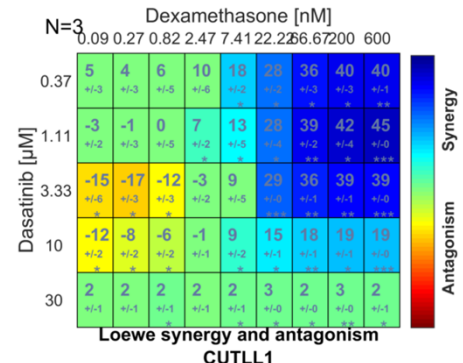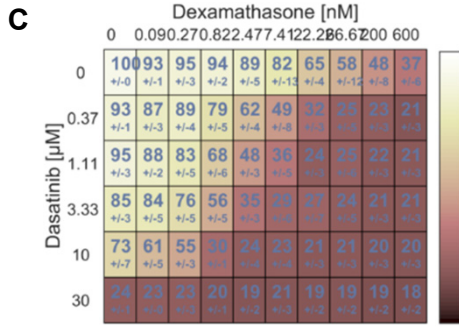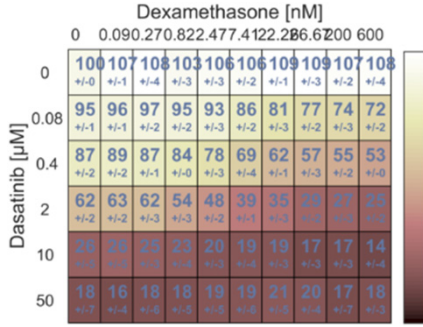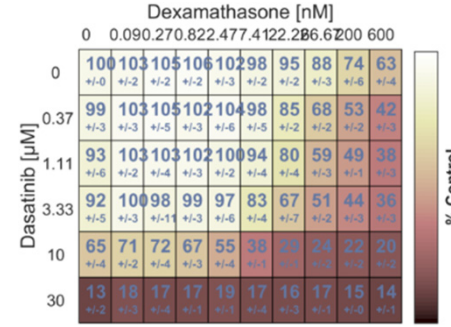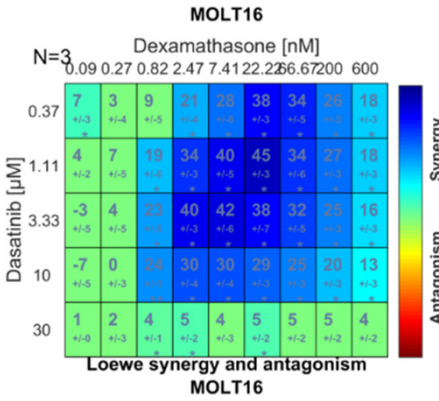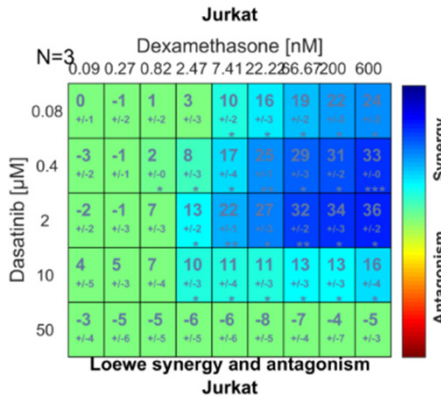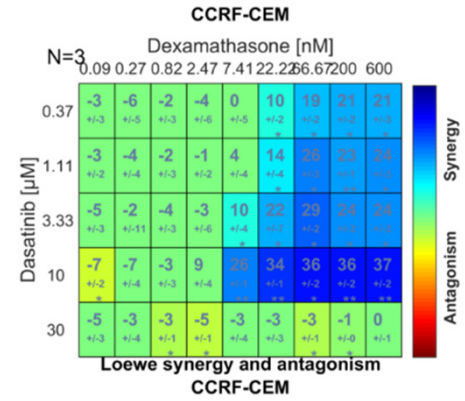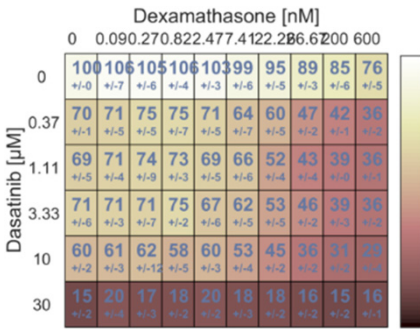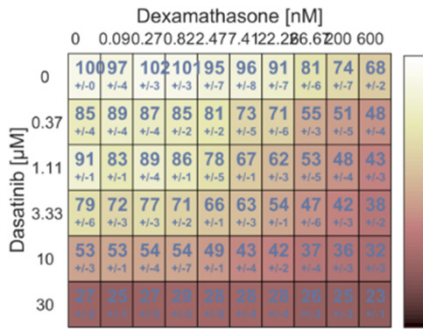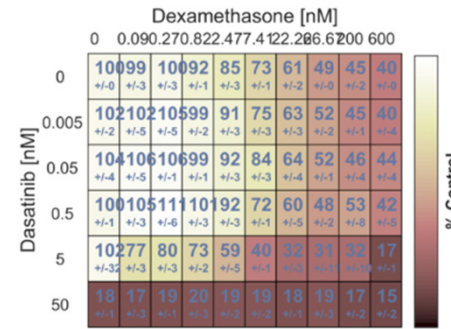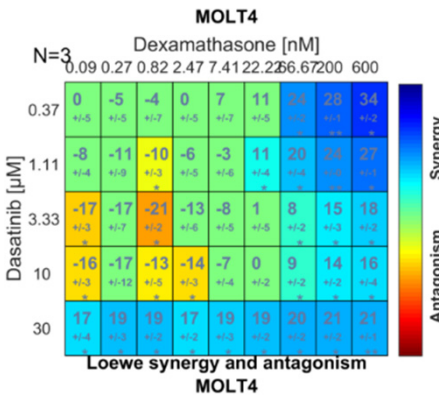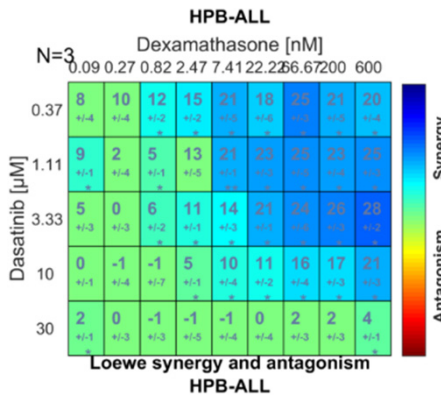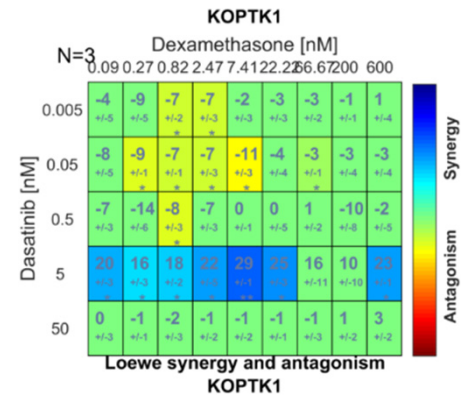



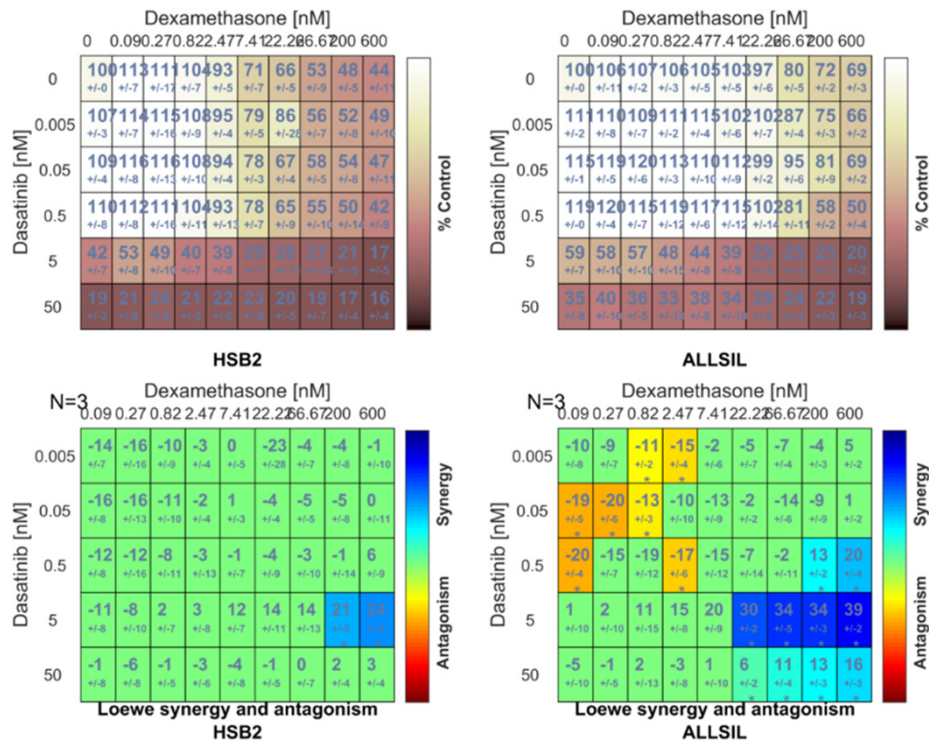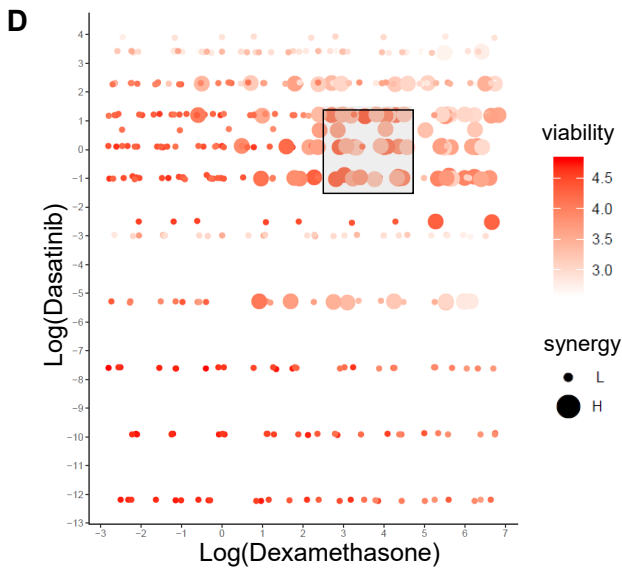

**Supplementary Figure 6. DEX and DAS act synergistically to induce cell death in T-ALL.** (A) Cell viability of parental CUTLL1 cells transduced with (mock), shNTC, shLCK#1 or shLCK#3 upon treatment with increasing DEX concentrations (0-1699 nM). (B-D) Drug matrix analyses with titration of DEX (0-600 nM) and DAS (0.08-50  $\mu$ M) for 72 h was performed in 10 T-ALL cell lines. (B, left) Cell viability of CUTLL1 with and without DAS (black line, no DAS; blue line, 0.37  $\mu$ M; red line, 3.33  $\mu$ M) in combination with increasing concentrations of DEX (0-600 nM) as derived from the drug matrix. (B, Right) Combeneft analysis of drug matrix demonstrates drug synergy in CUTLL1 cells at clinically relevant drug concentrations. (C) Combeneft analysis of drug matrix demonstrates varying levels of drug synergy in T-ALL cell lines. The brown shaded matrices reflect the percentage of viable cell after drug treatment relative to the percentage of viable cells under control conditions. (D) Bioinformatic analysis of all 10 T-ALL cell lines revealed a statistically significant enrichment of drug synergy at clinically relevant concentrations (shaded area). This synergy was observed at 8-110 nM of DEX and 0.223-4.5  $\mu$ M of DAS. Each circle represents one measurement in the drug matrices of 10 cell lines. Circle color represents cell viability. Circle size represents level of synergy calculated.

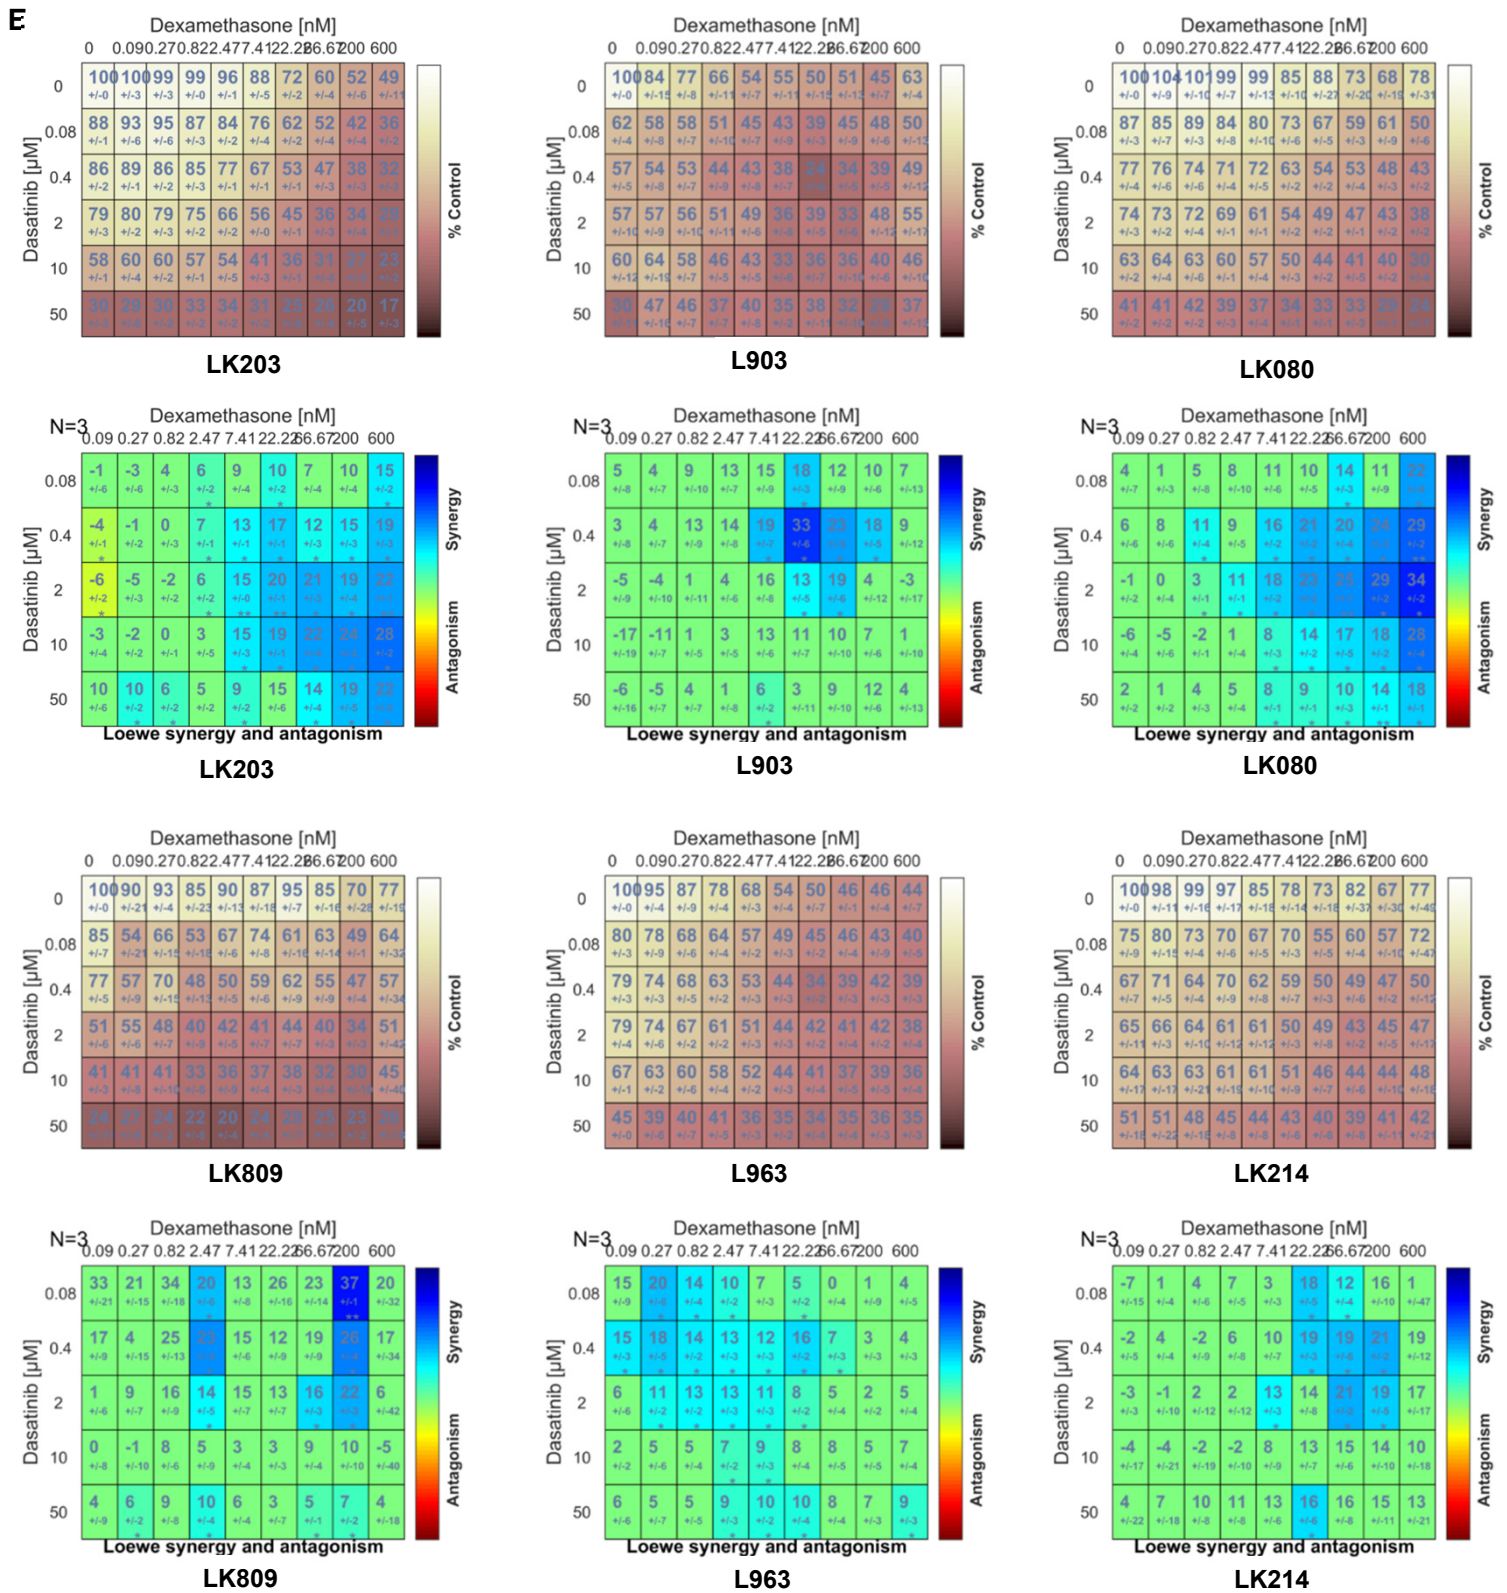

**Supplementary Figure 6.** (E) Combeneft analysis of drug matrices demonstrates varying levels of drug synergy in T-ALL PDX samples. The brown shaded matrices reflect cell viability (%) after drug treatment relative to the cell viability determined under control conditions.

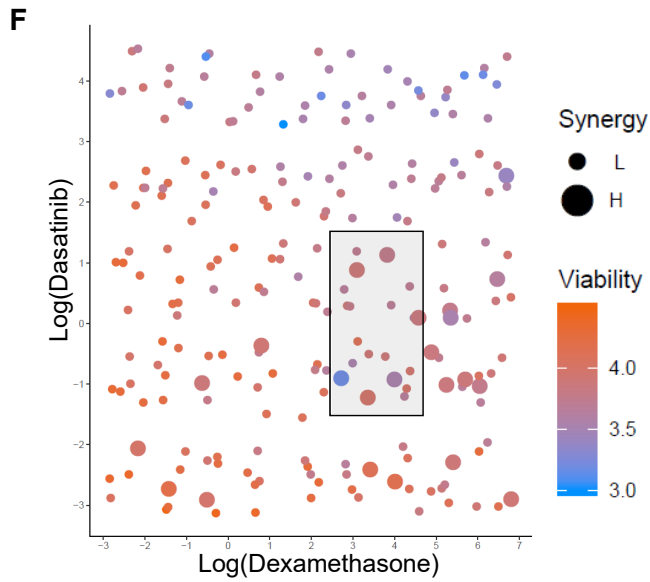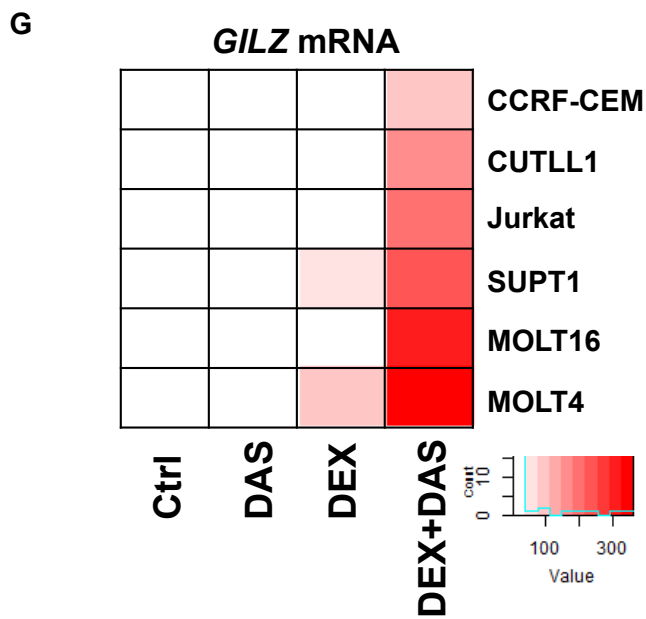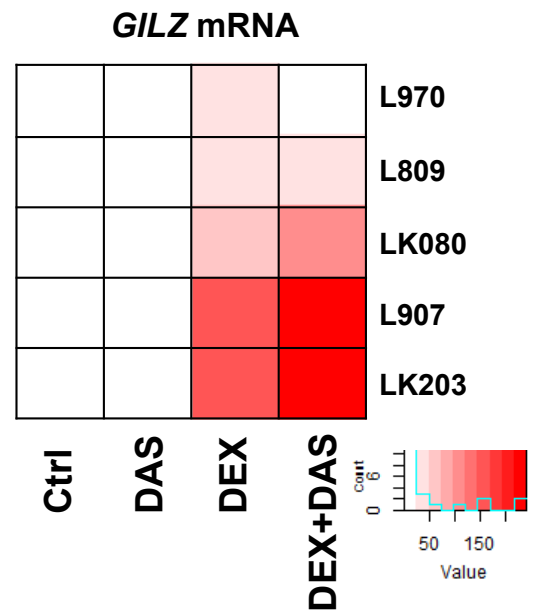

**Supplementary Figure 6.** (F) Bioinformatic analysis of drug matrices/Combeneft analyses of all PDX samples revealed a statistically significant enrichment of drug synergy at clinically relevant concentrations (shaded area). This synergy was observed at 8-110 nM of DEX and 0.223-4.5  $\mu$ M of DAS. Circle color represents cell viability. Circle size represents level of synergy calculated. (G) Real time qPCR analysis of *GILZ* mRNA expression in the cell lines CCRF-CEM, CUTLL1, Jurkat, SUPT1, MOLT16, MOLT4, PDX L970, L809, LK080, L907 and LK203 after exposure to control (Ctrl) conditions, DAS (2  $\mu$ M for cell lines and 1  $\mu$ M for PDXs), DEX (100 nM) or DAS+DEX combination treatment at the same concentrations for 24 h. *GILZ* mRNA expression was normalized to *GAPDH* mRNA expression. Red shading of boxes represent *GILZ* expression relative to control condition.

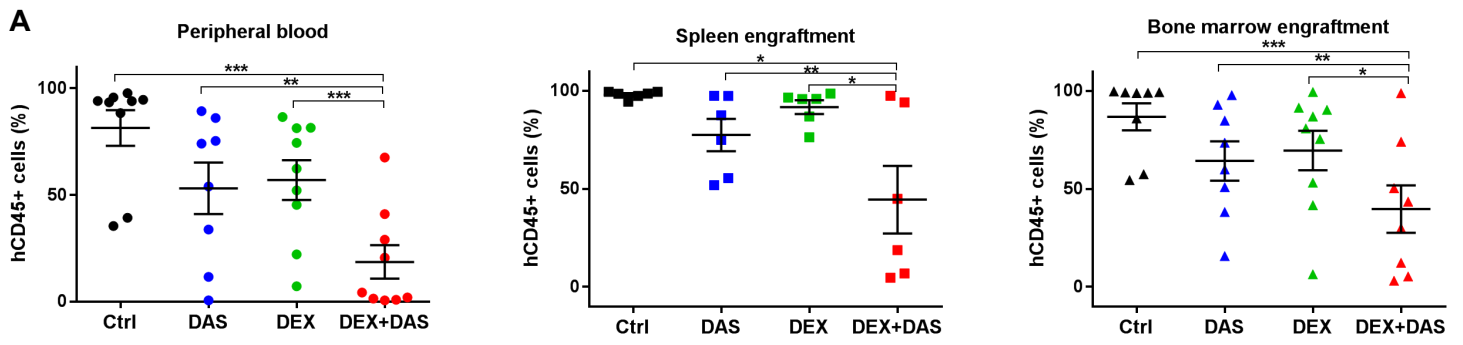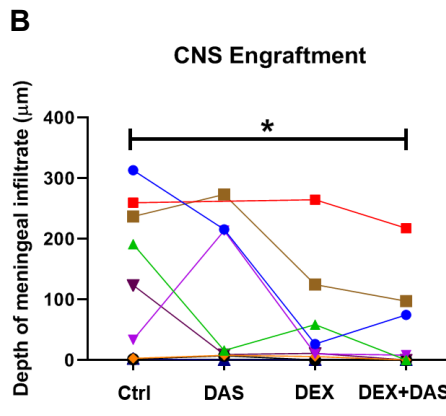

|       | Ctrl  | DAS   | DEX   | DEX + DAS |
|-------|-------|-------|-------|-----------|
| L970  | 313.2 | 215.4 | 26.6  | 74.4      |
| LK080 | 259.4 | n/a   | 264.6 | 217.6     |
| L809  | 191.2 | 15.8  | 58.4  | 0         |
| L907  | 33.6  | 213.6 | 10.2  | 8         |
| LK287 | 2.8   | 7.8   | 5.8   | 0         |
| LK290 | 1.6   | 7.2   | 0     | 0         |
| LK203 | 236.8 | 273   | 124.6 | 97        |
| L903  | 2     | 0     | 0     | 0         |
| L963  | 123.6 | 9     | 11.2  | 0         |

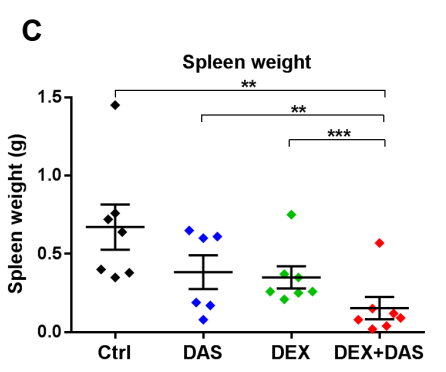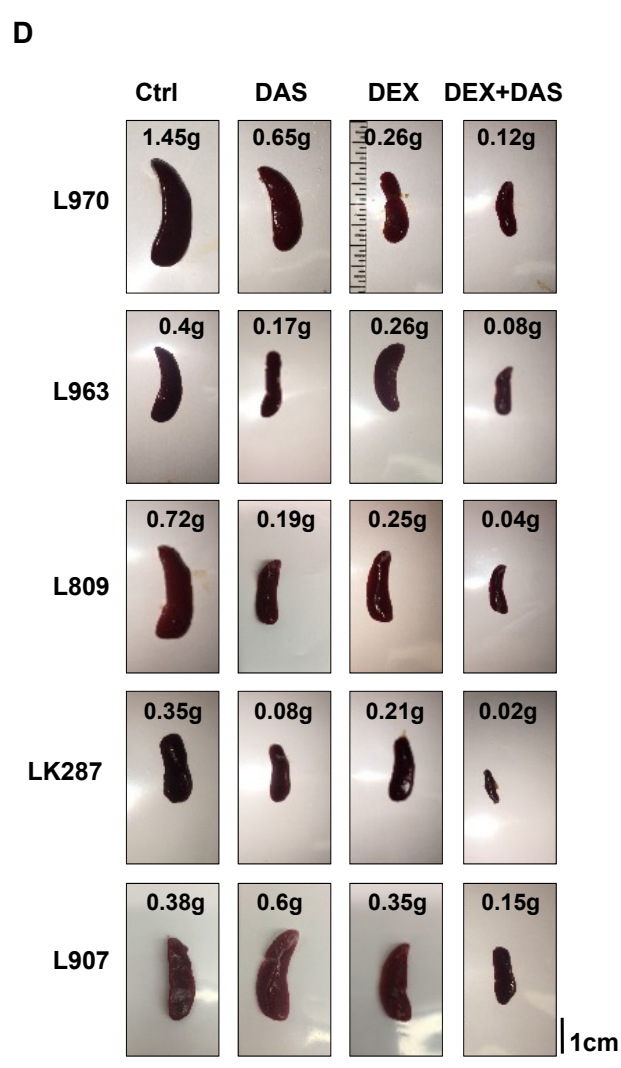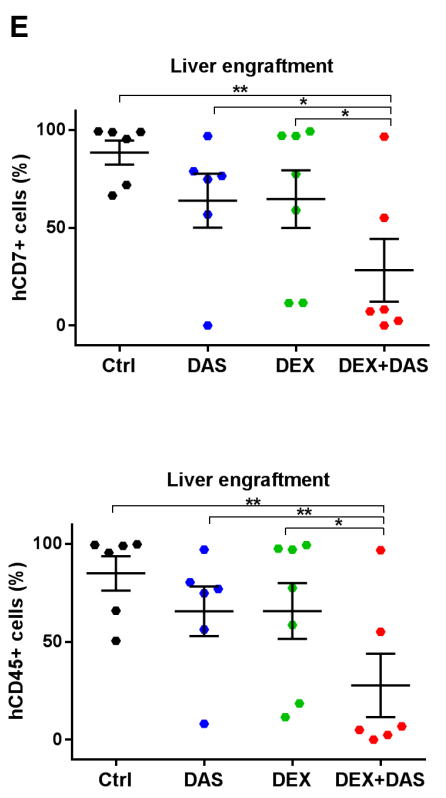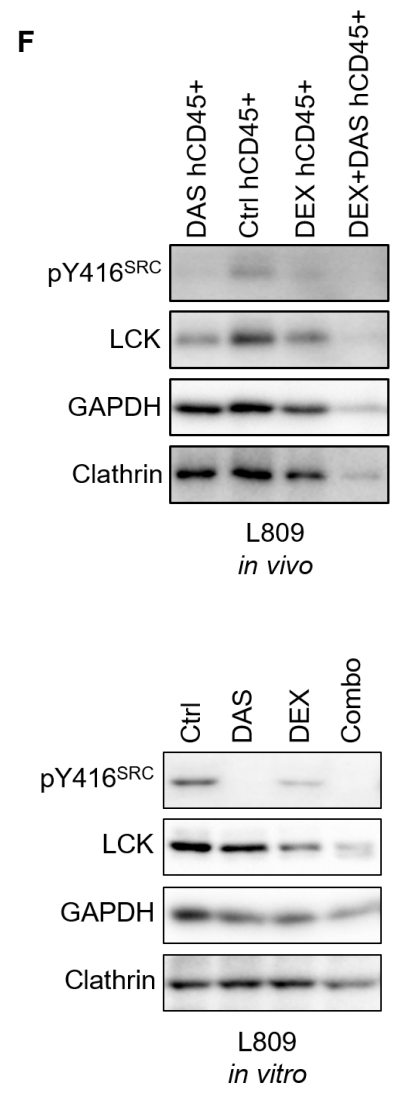

G

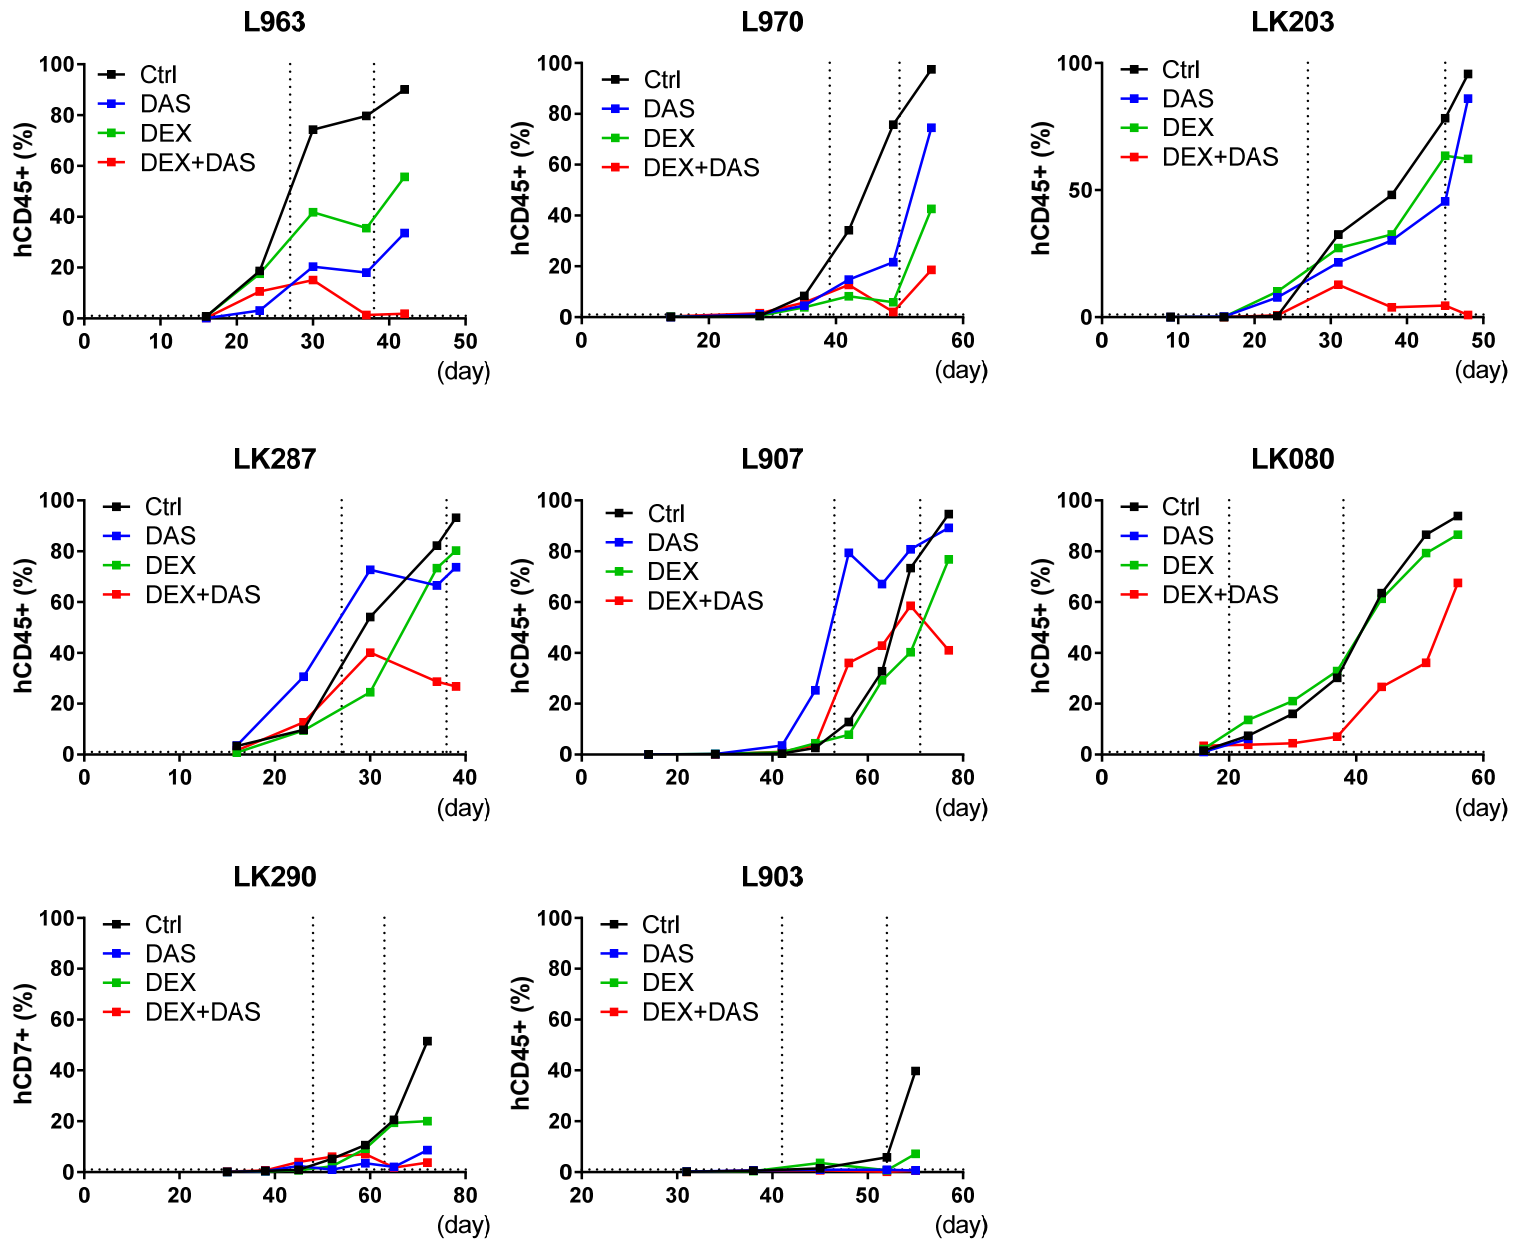

**Supplementary Figure 7. DEX + DAS synergize to impair leukemia engraftment in a phase II-like murine trial.**

(A) Summary of final human CD45+ engraftment (%) in peripheral blood (left), spleen (middle) and bone marrow (right) of mice treated with Ctrl (black), DAS (blue), DEX (green) or DEX+DAS (red). Paired student t-test was used. Peripheral blood: Ctrl vs DEX+DAS \*\*\* $p < 0.00001$ , DAS vs DEX+DAS \*\* $p = 0.00126$ , DEX vs DEX+DAS \*\*\* $p = 0.00032$ . Spleen: Ctrl vs DEX+DAS \* $p = 0.01068$ , DAS vs DEX+DAS \*\* $p = 0.004259$ , DEX vs DEX+DAS \* $p = 0.01425$ . Bone marrow: Ctrl vs DEX+DAS \*\*\* $p = 0.0003$ , DAS vs DEX+DAS \*\* $p = 0.0056$ , DEX vs DEX+DAS \* $p = 0.01579$ . (B) Average depth of CNS infiltrate across 5 coronal sections per mouse analyzed by paired t-test, significance level \* $p < 0.05$ . Table. Individual values for average depth of infiltrate across 5 sections measured in  $\mu\text{m}$  for each patient sample in the phase II-like trial. (C) Summary of spleen weight in mice treated with Ctrl (black), DAS (blue), DEX (green) or DEX+DAS (red). Paired student t-test was used. Ctrl vs DEX+DAS \*\* $p = 0.002996$ , DAS vs DEX+DAS \*\* $p = 0.006699$ , DEX vs DEX+DAS \*\*\* $p < 0.00001$ . (D) Spleen size and weight in mice derived from 5 PDX samples treated with Ctrl, DAS, DEX or DEX+DAS. (E) Summary of final human CD7+ or CD45+ engraftment (%) in liver of mice treated with Ctrl (black), DAS (blue), DEX (green) or DEX+DAS (red). Paired student t-test was used. Top: Ctrl vs DEX+DAS \*\* $p = 0.001248$ , DAS vs DEX+DAS \* $p = 0.01155$ , DEX vs DEX+DAS \* $p = 0.03188$ . Bottom: Ctrl vs DEX+DAS \*\* $p = 0.002323$ , DAS vs DEX+DAS \*\* $p = 0.00503$ , DEX vs DEX+DAS \* $p = 0.02264$ . (F) Western blotting of total and phosphorylated LCK (p-Y416<sup>SRC</sup>) protein levels of flow sorted hCD45+ cell lysates derived from the spleens of 4 mice injected with PDX L809 under 4 different treatment arms (Ctrl, DAS, DEX or DEX+DAS) relative to the housekeepers GAPDH and Clathrin (top). Western blotting of total and phosphorylated LCK protein levels of whole cell lysates of PDX L809 cells (97% purity) treated *in vitro* for 24 hours with Ctrl, DAS (1  $\mu\text{M}$ ), DEX (100 nM) or DEX+DAS, relative to the housekeepers GAPDH and Clathrin. (G) Engraftment of hCD45+ cells (%) was determined weekly in peripheral blood derived from mice injected with PDX samples. Engraftment levels are shown starting from day of injection (day 0) in mice receiving control vehicle (Ctrl, black), DAS (blue), DEX (green) or DEX+DAS (red). The vertical dotted lines indicate the treatment window.

**Supplementary Figure 1A. Relative gene expression of targets in the shRNA screen.** *In silico* analysis, using the Cancer Cell Line Encyclopedia (CCLE), of gene expression of *LCK*, *FYN*, *ZAP70*, *PTCRA*, *LAT* and *CD3E* in a panel of cancer cell lines.

**Supplementary Figure 1B. Relative gene expression of *LCK* and *PTCRA* in a panel of cell lines and PDX samples.** *LCK* and *pTCRA* expression was determined in various T-ALL cell lines, 697 and REH (B-lineage ALL cell lines) and TK6 (lymphoblastoid cell line) by real time qPCR. *GAPDH* served as reference gene for normalization.

**Supplementary Figure 1C-F. Gradual depletion of shLCK#3 in T-ALL cell lines and PDX LK203 *ex vivo*.** Cells were lentivirally transduced with the pLKO5-shRNA library and the abundance of shRNAs were determined after 40 days (T-ALL cell lines) and 30 days (PDX LK203) growth *ex vivo* (C) Volcano plots representing the change in shRNA representation over time (slope, x-axis) with negative values representing depletion. The y-axis represents the significance in enrichment or depletion of shRNA constructs (log<sub>10</sub> scale). Each dot represents an individual shRNA construct. Dots above the blue line have significantly changed ( $p < 0.05$ ). (D) Heatmap depicting relative representation of shRNA constructs after *in vitro* culture of 4 T-ALL cell lines (40 days). (E) Change in shRNA representation (logCPM) over time (days) for NTC (red, green), *LCK* and *ZAP70* (lib 1 blue, lib 2 purple). shRNA derived from library 1 or 2. (F) Volcano plot representing the magnitude of the fold change (log<sub>2</sub>) in shRNA abundance derived from PDX LK203 leukemia cells on the x-axis. Each dot represents an individual shRNA construct. The y-axis represents the significance in enrichment or depletion of shRNA constructs (log<sub>10</sub> scale). Dots above the blue line are significantly depleted ( $p < 0.05$ ).

**Supplementary Figure 1G. *LCK* protein expression in T-ALL.** Western Blot analysis of *LCK* and p-Y416<sup>SRC</sup> protein expression in a panel of cell lines (left) and PDX samples (right). Comparative expression of housekeepers *GAPDH* and *Clathrin* is shown.

**Supplementary Figure 2. Competitive assays underline a critical role for *LCK* in T-ALL cell proliferation.** (A) T-ALL cell line CUTLL1 was transduced with GFP expressing shLCK (blue), shZAP70 (purple), shPTCRA (red) or shNTC (black; RUNX1/ETO, FLG, NTC) expressing constructs. The cells were seeded in a 1:1 ratio with non-transduced parental cells *in vitro*. Cells were cultured and analyzed repetitively for the presence of GFP+ cells over a time period of 40 days. A relative GFP expression of 1 denotes a mixture of 50% GFP+ cells with 50% parental cells (ratio 1:1). A value of 0.5 means GFP+ cells represent 25% of total cells (ratio 1:4). Three separate shRNAs (#1,2,3) were used to target *LCK*, *PTCRA* and *ZAP70*. The knockdown efficiency at mRNA level is indicated in black bars on the right side of each proliferation plot. (B) CUTLL1 and MOLT4 cells were transduced with GFP expressing shFYN (pink) or shNTC (black) constructs and seeded in a 1:1 ratio with non-transduced parental cells *in vitro*. Cells were cultured and analyzed repetitively for the presence of GFP+ cells over a time period of 40 days. The knockdown efficiency at mRNA level is indicated in black bars on the right side of each proliferation plot. (C)

MOLT4 cells were lentivirally transduced with shNTC (non-targeting control), shLCK#3 (blue), shPTCRA#1 (red), or shZAP70#1 (purple) expression constructs and seeded in a 1:1 ratio with non-transduced parental cells *in vitro*. Cells were cultured and analyzed repetitively by flow cytometry for the presence of GFP+ cells over a time period of 40 days.

**Supplementary Figure 3. Targeted shRNA screen identifies critical role for LCK in T-ALL progression in immunocompromised NSG mice.** (A) Schematic representation of the *in vivo* targeted shRNA screen. (B) Volcano plot representing the magnitude of the fold change (log<sub>2</sub>) in shRNA abundance in PDX L963 bone marrow on the x-axis. shLCK#3 (red dot) represents the shRNA construct with most significant depletion in bone marrow. Bar plot of the normalized shLCK#1 sequencing reads (log<sub>2</sub>) in leukemic cells derived from the bone marrow (orange) or spleen (blue) of 6 individual mice (M1-6), relative to the frequency of these reads before transplantation (green, base line B1-3). (C) Flow cytometric analysis of representation of shNTC (red fluorescent protein, RFP) or shLCK#3 (GFP) constructs in MOLT4 *in vivo* competitive outgrowth assay. MOLT4 cells were derived from splenic tissue.

**Supplementary Figure 4. LCK knockdown results in cell cycle arrest.** (A) Cell cycle status was determined by flow cytometry using Hoechst 33342 in Jurkat and MOLT4 cell lines. (B) Relative S phase ratio in PDX L963 after transduction with shLCK#3 versus shNTC. (C) PDX LK203 and L963 cells were electroporated with siRNA directed against LCK or NTC (Ctrl). Phosflow analysis after 8 days identified reduction in p-Y416<sup>SRC</sup> and total LCK, leading to significant cell cycle arrest in LK203 (\*\*p=0.004, n=3). (E) Flow cytometric analysis of T-ALL cells stained with PE-Annexin V/7-AAD after knockdown with shNTC or shLCK#3. Annexin V positivity, as indicator of early apoptosis, is indicated on the y-axis.

**Supplementary Figure 5. DAS inhibits LCK function and causes cell cycle arrest.** (A-D) Indicated T-ALL cell lines (A, B) or PDX T-ALL (C-D) were treated with vehicle control or DAS (2 μM for cell lines, 1 μM for PDXs) for 24 h. Phosphorylation of total LCK, p-Y416<sup>SRC</sup>, p-Y505<sup>LCK</sup>, total PLCγ1, p-Y783<sup>PLCγ1</sup>, total ZAP70 and p-Y493<sup>ZAP70</sup> was assessed in Jurkat or CUTLL1 cells (A) and in PDX L970, L907, LK080 and L809 (C) by Western Blot analysis. (B and D) Cell cycle was analysed after Hoechst staining and flow cytometric assessment in various T-ALL cell lines (B) and PDX LK080 (\*\*p=0.0049, n=3) (D). (E) The *in vitro* sensitivity of a panel of PDX samples to DAS (GI<sub>50</sub>) was correlated with the ratio of p-Y416<sup>SRC</sup> / total LCK as determined by Phosflow.

**Supplementary Figure 6. DEX and DAS act synergistically to induce cell death in T-ALL.** (A) Cell viability of parental CUTLL1 cells transduced with (mock), shNTC, shLCK#1 or shLCK#3 upon treatment with increasing DEX concentrations (0-1699 nM). (B-F) Drug matrix analyses with titration of DEX (0-600 nM) and DAS (0.08-50 μM) for 72 h was performed in 10 T-ALL cell lines. (B, left) Cell viability of CUTLL1 with and without DAS (black line, no DAS; blue line, 0.37 μM; red line, 3.33 μM) in combination with increasing concentrations of DEX (0-600 nM) as derived from the drug matrix. (B, Right) Combobenefit analysis of drug matrix demonstrates drug synergy

in CUTLL1 cells at clinically relevant drug concentrations. (C) Combenefit analysis of drug matrix demonstrates varying levels of drug synergy in T-ALL cell lines. The brown shaded matrices reflect the percentage of viable cell after drug treatment relative to the percentage of viable cells under control conditions. (D) Bioinformatic analysis of all 10 T-ALL cell lines revealed a statistically significant enrichment of drug synergy at clinically relevant concentrations (shaded area). This synergy was observed at 8-110 nM of DEX and 0.223-4.5  $\mu$ M of DAS. Each circle represents one measurement in the drug matrices of 10 cell lines. Circle color represents cell viability. Circle size represents level of synergy calculated.

**Supplementary Figure 6.** (E) Combenefit analysis of drug matrices demonstrates varying levels of drug synergy in T-ALL PDX samples. The brown shaded matrices reflect cell viability (%) after drug treatment relative to the cell viability determined under control conditions.

**Supplementary Figure 6.** (F) Bioinformatic analysis of drug matrices/Combeneft analyses of all PDX samples revealed a statistically significant enrichment of drug synergy at clinically relevant concentrations (shaded area). This synergy was observed at 8-110 nM of DEX and 0.223-4.5  $\mu$ M of DAS. Circle color represents cell viability. Circle size represents level of synergy calculated. (G) Real time qPCR analysis of *GILZ* mRNA expression in the cell lines CCRF-CEM, CUTLL1, Jurkat, SUPT1, MOLT16, MOLT4, PDX L970, L809, LK080, L907 and LK203 after exposure to control (Ctrl) conditions, DAS (2  $\mu$ M for cell lines and 1  $\mu$ M for PDXs), DEX (100 nM) or DAS+DEX combination treatment at the same concentrations for 24 h. *GILZ* mRNA expression was normalized to *GAPDH* mRNA expression. Red shading of boxes represent *GILZ* expression relative to control condition.

**Supplementary Figure 7. DEX + DAS synergize to impair leukemia engraftment in a phase II-like murine trial.** (A) Summary of final human CD45+ engraftment (%) in peripheral blood (left), spleen (middle) and bone marrow (right) of mice treated with Ctrl (black), DAS (blue), DEX (green) or DEX+DAS (red). Paired student t-test was used. Peripheral blood: Ctrl vs DEX+DAS \*\*\* $p < 0.00001$ , DAS vs DEX+DAS \*\* $p = 0.00126$ , DEX vs DEX+DAS \*\*\* $p = 0.00032$ . Spleen: Ctrl vs DEX+DAS \* $p = 0.01068$ , DAS vs DEX+DAS \*\* $p = 0.004259$ , DEX vs DEX+DAS \* $p = 0.01425$ . Bone marrow: Ctrl vs DEX+DAS \*\*\* $p = 0.0003$ , DAS vs DEX+DAS \*\* $p = 0.0056$ , DEX vs DEX+DAS \* $p = 0.01579$ . (B) Average depth of CNS infiltrate across 5 coronal sections per mouse analyzed by paired t-test, significance level \* $p < 0.05$ . Table. Individual values for average depth of infiltrate across 5 sections measured in  $\mu$ m for each patient sample in the phase II-like trial. (C) Summary of spleen weight in mice treated with Ctrl (black), DAS (blue), DEX (green) or DEX+DAS (red). Paired student t-test was used. Ctrl vs DEX+DAS \*\* $p = 0.002996$ , DAS vs DEX+DAS \*\* $p = 0.006699$ , DEX vs DEX+DAS \*\*\* $p < 0.00001$ . (D) Spleen size and weight in mice derived from 5 PDX samples treated with Ctrl, DAS, DEX or DEX+DAS. (E) Summary of final human CD7+ or CD45+ engraftment (%) in liver of mice treated with Ctrl (black), DAS (blue), DEX (green) or DEX+DAS (red). Paired student t-test was used. Top: Ctrl vs DEX+DAS \*\* $p = 0.001248$ , DAS vs DEX+DAS \* $p = 0.01155$ , DEX vs DEX+DAS \* $p = 0.03188$ . Bottom: Ctrl vs DEX+DAS \*\* $p = 0.002323$ , DAS vs DEX+DAS \*\* $p = 0.00503$ , DEX vs DEX+DAS \* $p = 0.02264$ . (F) Western blotting of total and phosphorylated LCK (p-Y416<sup>SRC</sup>) protein



levels of flow sorted hCD45+ cell lysates derived from the spleens of 4 mice injected with PDX L809 under 4 different treatment arms (Ctrl, DAS, DEX or DEX+DAS) relative to the housekeepers GAPDH and Clathrin (top). Western blotting of total and phosphorylated LCK protein levels of whole cell lysates of PDX L809 cells (97% purity) treated *in vitro* for 24 hours with Ctrl, DAS (1  $\mu$ M), DEX (100 nM) or DEX+DAS, relative to the housekeepers GAPDH and Clathrin. (G) Engraftment of hCD45+ cells (%) was determined weekly in peripheral blood derived from mice injected with PDX samples. Engraftment levels are shown starting from day of injection (day 0) in mice receiving control vehicle (Ctrl, black), DAS (blue), DEX (green) or DEX+DAS (red). The vertical dotted lines indicate the treatment window.

Supplementary Table 1. Sequences of shRNAs used in targeted screen.

| Gene | Oligo Sequences                                                              |
|------|------------------------------------------------------------------------------|
| 1F   | shFYN#1 AGCGACCGATTGATAGAAGACAATGATAGTGAAGCCACAGATGATCATTTGCTTCTATCAATCGGG   |
| 1R   | GGCACCCGGATTGATAGAAGACAATGATACATCTGTGGCTTCACTATCATTGCTTCTATCAATCGGT          |
| 2F   | sh#FYN2 AGCGAAGACAATGAGTACACAGCAATAGTGAAGCCACAGATGATTGCTGTACTCATTGCTTCC      |
| 2R   | GGCAGAAACAATGAGTACACAGCAATACATCTGTGGCTTCACTATTGCTGTACTCATTGCTTCC             |
| 3F   | shFYN#3 AGCGAATAGAGATCTGCGATCAGCAATAGTGAAGCCACAGATGATTGCTGTACTCAGATCTCTATG   |
| 3R   | GGCACATAGAGATCTGCGATCAGCAATACATCTGTGGCTTCACTATTGCTGTACTCAGATCTCTATT          |
| 4F   | shLCK#1 AGCGACGGAATTATATTCATCGTACTAGTGAAGCCACAGATGATGACGATGAATATAATCCGC      |
| 4R   | GGCAGCGGAATTATATTCATCGTACTACATCTGTGGCTTCACTAGTACGATGAATATAATCCGT             |
| 5F   | shLCK#2 AGCGACACATGTCTGTACATGTGTATAGTGAAGCCACAGATGATACACATGTACAAGACATGTGC    |
| 5R   | GGCAGCACATGTCTGTACATGTGTATACATCTGTGGCTTCACTATACACATGTACAAGACATGTGT           |
| 6F   | shLCK#3 AGCGACCCATCTACATCATCTGAATAGTGAAGCCACAGATGATTCACTGATGATGATAGTGGGC     |
| 6R   | GGCAGCCATCTACATCATCTGAATACATCTGTGGCTTCACTATTCACTGATGATGATAGTGGGT             |
| 7F   | shPTCRA#1 AGCGCGCAGATGACTGAGAACAATTAAGTGAAGCCACAGATGATTAATGTTCTCAGTCACTGCT   |
| 7R   | GGCAGCAGATGACTGAGAACAATAACATCTGTGGCTTCACTAATTAATGTTCTCAGTCACTGCT             |
| 8F   | shPTCRA#2 AGCGACAGCACAGGCTGTGTCTCAATAGTGAAGCCACAGATGATTGAGCACCAGCCCTGTGCTGG  |
| 8R   | GGCACCAGCACAGGCTGTGTCTCAATACATCTGTGGCTTCACTATTGAGCACCAGCCCTGTGCTGT           |
| 9F   | shPTCRA#3 AGCGCAGGGCTTACCTCAGCAGTTATAGTGAAGCCACAGATGATAAAGCTGAGGTAAGACCCCT   |
| 9R   | GGCAAAGGGCTTACCTCAGCAGTTATACATCTGTGGCTTCACTAATAGCTGAGGTAAGACCCCTG            |
| 10F  | shZAP70#1 AGCGCGGCGTAGATCACCAGAATAAATAGTGAAGCCACAGATGATTTATCTGGTATCTACGCC    |
| 10R  | GGCAAGGGCTAGATCACCAGAATAAATACATCTGTGGCTTCACTAATTTATCTGGTATCTACGCCG           |
| 11F  | shZAP70#2 AGCGAGCCCTGCCCTCATCTATGGGTAGTGAAGCCACAGATGATCCATAGATGAGGGACAGGGCG  |
| 11R  | GGCAGCCCTGCCCTCATCTATGGGTACATCTGTGGCTTCACTACCCATAGATGAGGGACAGGGCT            |
| 12F  | shZAP70#3 AGCGCCGCGCAAGGCCCTACAAGAATAGTGAAGCCACAGATGATTCTGTGGGCTTGTGGCCCT    |
| 12R  | GGCAAGGCCCAAGGCCCTACAAGAATACATCTGTGGCTTCACTATTCTGTAGGGCTTGTGGCCG             |
| 13F  | shLAT#1 AGCGCCATGGAGTCCATTGATGATTTAGTGAAGCCACAGATGATAATCATCAATGGACTCCATGGA   |
| 13R  | GGCATCCATGGAGTCCATTGATGATTTACATCTGTGGCTTCACTAATCATCAATGGACTCCATGGG           |
| 14F  | shLAT#2 AGCGCCAGTGTGGGAGCTACGAGAATAGTGAAGCCACAGATGATTCTCGTAGCTGCCACACCTGT    |
| 14R  | GGCAACAGTGTGGGAGCTACGAGAATACATCTGTGGCTTCACTATTCTCGTAGCTGCCACACTGT            |
| 15F  | shLAT#3 AGCGCCCTCAGATAGTTTGTATCAATAGTGAAGCCACAGATGATTGGATACAAACTATCTGAGGA    |
| 15R  | GGCATCTCAGATAGTTTGTATCAATACATCTGTGGCTTCACTATTGGATACAAACTATCTGAGGG            |
| 16F  | shCD3E#1 AGCGCACAGAAAGATGCGAACTTTATAGTGAAGCCACAGATGATAAAAGTTCGCATCTTCTGGTT   |
| 16R  | GGCAAAACAGAAAGATGCGAACTTTATACATCTGTGGCTTCACTAATAAAGTTCGCATCTTCTGGTT          |
| 17F  | shCD3E#2 AGCGAGGGCAAGATGGTAATGAAGAATAGTGAAGCCACAGATGATTCTCATTACCATTGGCCCG    |
| 17R  | GGCAGGGCAAGATGGTAATGAAGAATACATCTGTGGCTTCACTATTCTCATTACCATTGGCCCT             |
| 18F  | shCD3E#3 AGCGACCCCTTCCAGGATATTTATAGTGAAGCCACAGATGATAAATAATCTGGCAAGAGGGC      |
| 18R  | GGCAGCCCTTCCAGGATATTTATACATCTGTGGCTTCACTAATAAATAATCTGGCAAGAGGGT              |
| 19F  | shRPL9#1 AGCGGCCCCAGAAAGATGAATTAATCTAGTGAAGCCACAGATGATGATTAATTCATCTTCTGGGCT  |
| 19R  | GGCAAGCCAGAAAGATGAATTAATCTACATCTGTGGCTTCACTAGATTAATTCATCTTCTGGGCT            |
| 20F  | shRPL9#2 AGCGAAATTTAGCTTGTTCAAATTTAGTGAAGCCACAGATGATAAATTTGAAACAAGCTCAATGTC  |
| 20R  | GGCAGACATTTAGCTTGTTCAAATTTACATCTGTGGCTTCACTAATTTGAAACAAGCTCAATGTT            |
| 21F  | shRPS29#1 AGCGCTCCCTCAGTACCGAAGGATATAGTGAAGCCACAGATGATATCTTCCGCTACTGACGGAA   |
| 21R  | GGCATTCCCTCAGTACCGAAGGATATACATCTGTGGCTTCACTATATCTTCCGCTACTGACGGAG            |
| 22F  | shRPS29#2 AGCGACGGCACGGTCTGATCCGGAATAGTGAAGCCACAGATGATTCCGGATCAGACCGTGGCCGG  |
| 22R  | GGCACGGCACGGTCTGATCCGGAATACATCTGTGGCTTCACTATTCCGGATCAGACCGTGGCCT             |
| 23F  | shCD19#1 AGCGCGCTCAAGACGCTGGAAGTATTAGTGAAGCCACAGATGATAACTTTCCAGCGTCTTGAGCT   |
| 23R  | GGCAAGCTCAAGACGCTGGAAGTATTACATCTGTGGCTTCACTAATACTTTCCAGCGTCTTGAGCG           |
| 24F  | shCD19#2 AGCGCCCCACCAGGATTTCTCAATAGTGAAGCCACAGATGATTGAAGAATCTCTGGTGGGGT      |
| 24R  | GGCAACCCACCAGGATTTCTCAATACATCTGTGGCTTCACTATTGAAGAATCTCTGGTGGGGG              |
| 25F  | shTRPM7#1 AGCGGCCCTGACGGTAGATACATTATAGTGAAGCCACAGATGATAATGATATCTACCGTACGGGCT |
| 25R  | GGCAAGCCCTGACGGTAGATACATTATACATCTGTGGCTTCACTAATAATGATATCTACCGTACGGGCT        |
| 26F  | shTRPM7#2 AGCGCGCTGCAGATCTGCTAGCGTATTAGTGAAGCCACAGATGATAACGCTAGCAGATCTGCAGCT |
| 26R  | GGCAAGCTGCAGATCTGCTAGCGTATTACATCTGTGGCTTCACTAATACGCTAGCAGATCTGCAGCG          |
| 27F  | shKLHL7 AGCGCGCAGTTGGCTCTATAGTTTATTAGTGAAGCCACAGATGATAAACTATAGAGCCAAGTCT     |
| 27R  | GGCAAGCAGTTGGCTCTATAGTTTATTACATCTGTGGCTTCACTAATAAACTATAGAGCCAAGTCT           |
| 28F  | shDDB2 AGCGAGGAGATATCATGCTCTGGAATTAGTGAAGCCACAGATGATAATCCAGAGCATGATATCTCC    |
| 28R  | GGCAGGAGATATCATGCTCTGGAATTACATCTGTGGCTTCACTAATCCAGAGCATGATATCTCCT            |
| 29F  | shSES2 AGCGCGGAGGGATATTAGATTATAATAGTGAAGCCACAGATGATTATAACTAATACTCCCTCCT      |
| 29R  | GGCAAGGAGGGATATTAGATTATAATACATCTGTGGCTTCACTATTATAACTAATACTCCCTCCT            |
| 30F  | shERGIC3 AGCGACCTTCAAGAACCAGATACTATAGTGAAGCCACAGATGATAAGTATCTGGGTTCTTGAAGGC  |
| 30R  | GGCAGCCTTCAAGAACCAGATACTATACATCTGTGGCTTCACTATAGTATCTGGGTTCTTGAAGGT           |
| 31F  | shFLG AGCGCGGATATAGACCACAACAAGAATAGTGAAGCCACAGATGATTCTTGTGGTCTATATCCA        |
| 31R  | GGCATGGATATAGACCACAACAAGAATACATCTGTGGCTTCACTATTCTTGTGGTCTATATCCG             |
| 32F  | shRUNX1/ETO AGCGAAACCTCGAAATCGTACTGAGATAGTGAAGCCACAGATGATCTCAGTACGATTTGAGGTT |
| 32R  | GGCAGAACTCGAAATCGTACTGAGATACATCTGTGGCTTCACTATCTCAGTACGATTTGAGGTT             |
| 33F  | shPTEN#1 AGCGAAGCGCTATGTGATTTATTAGTGAAGCCACAGATGATAAATAACACATAGCGCCT         |
| 33R  | GGCAGAGCGCTATGTGATTTATTACATCTGTGGCTTCACTAATAATAACACATAGCGCCT                 |
| 34F  | shPTEN#2 AGCGCCACGACGGGAAGCAAGTTCAATAGTGAAGCCACAGATGATAAATGCTTCCCGTCTGT      |
| 34R  | GGCAACGACGACGGGAAGCAAGTTCAATCTGTGGCTTCACTAATAAATGCTTCCCGTCTGT                |
| 35F  | shPTEN#3 AGCGACAGCTAAAGGTGAAGATATATAGTGAAGCCACAGATGATAATCTTCACTTTAGCTGGC     |
| 35R  | GGCAGCCAGCTAAAGGTGAAGATATATACATCTGTGGCTTCACTATATCTTCACTTTAGCTGGT             |
| 36F  | shNTC AGCGATCTCGTTGGGCGAGATAAGTGAAGCCACAGATGATCTACTCTCGCCAAGCGAGAG           |
| 36R  | GGCACTCTCGTTGGGCGAGATAAGTACATCTGTGGCTTCACTACTCTCGCCAAGCGAGAT                 |

**Supplementary Table 2. Change in shRNA count over time in CUTLL1.**

| shRNA       | gene      | slope    | logCPM   | LR       | PValue   | FDR      |
|-------------|-----------|----------|----------|----------|----------|----------|
| shCD19#1    | CD19      | -0.01426 | 14.71381 | 0.229565 | 0.631846 | 0.787689 |
| shCD19#2    | CD19      | 0.01455  | 14.51295 | 0.233252 | 0.629123 | 0.787689 |
| shCD3e#1    | CD3e      | -0.00759 | 14.72741 | 0.066942 | 0.795843 | 0.842657 |
| shCD3e#2    | CD3e      | -0.01372 | 14.76283 | 0.225394 | 0.63496  | 0.787689 |
| shCD3e#3    | CD3e      | 0.017933 | 14.88124 | 0.403658 | 0.525206 | 0.787689 |
| shDDB2      | DDB2      | 0.00466  | 15.3542  | 0.028696 | 0.865483 | 0.865483 |
| shERGIC3    | ERGIC3    | -0.01392 | 14.61057 | 0.229422 | 0.631952 | 0.787689 |
| shFLG       | FLG       | -0.01381 | 15.7347  | 0.258837 | 0.61092  | 0.787689 |
| shFYN#1     | FYN       | -0.03403 | 14.6642  | 1.363196 | 0.242984 | 0.460391 |
| shFYN#2     | FYN       | -0.03946 | 14.81744 | 1.948541 | 0.162744 | 0.344635 |
| shFYN#3     | FYN       | 0.021791 | 14.52647 | 0.547283 | 0.45943  | 0.787594 |
| shKLHL7     | KLHL7     | 0.014446 | 14.82185 | 0.258797 | 0.610948 | 0.787689 |
| shLAT#1     | LAT       | 0.012082 | 14.28583 | 0.142321 | 0.705985 | 0.787689 |
| shLAT#2     | LAT       | 0.049563 | 14.24421 | 2.267049 | 0.132151 | 0.29734  |
| shLAT#3     | LAT       | 0.011454 | 14.41083 | 0.137908 | 0.71037  | 0.787689 |
| shLCK#1     | LCK       | -0.05504 | 14.65581 | 3.562372 | 0.059103 | 0.173345 |
| shLCK#2     | LCK       | -0.01924 | 15.03996 | 0.410081 | 0.521928 | 0.787689 |
| shLCK#3     | LCK       | -0.35675 | 14.29463 | 132.3253 | 1.27E-30 | 4.57E-29 |
| shNTC       | NTC       | 0.026824 | 14.92501 | 0.916581 | 0.338374 | 0.609074 |
| shPTCRA#1   | PTCRA     | 0.144236 | 14.12509 | 14.74569 | 0.000123 | 0.000554 |
| shPTCRA#2   | PTCRA     | 0.04774  | 14.35548 | 2.492345 | 0.114401 | 0.286763 |
| shPTCRA#3   | PTCRA     | -0.00638 | 14.61162 | 0.044858 | 0.832265 | 0.856044 |
| shPTEN#1    | PTEN      | 0.233804 | 15.29035 | 71.80669 | 2.37E-17 | 2.14E-16 |
| shPTEN#2    | PTEN      | 0.10558  | 14.9605  | 12.22175 | 0.000472 | 0.001889 |
| shPTEN#3    | PTEN      | 0.270945 | 14.94674 | 89.43219 | 3.17E-21 | 5.71E-20 |
| shRPL9#1    | RPL9      | -0.03939 | 14.58448 | 1.841226 | 0.174807 | 0.349615 |
| shRPL9#2    | RPL9      | -0.06889 | 15.13805 | 5.806092 | 0.015971 | 0.052268 |
| shRPS29#1   | RPS29     | -0.04414 | 14.94927 | 2.424066 | 0.119484 | 0.286763 |
| shRPS29#2   | RPS29     | 0.287987 | 13.31127 | 41.1585  | 1.40E-10 | 1.01E-09 |
| shRUNX1/ETC | RUNX1/ETC | 0.009921 | 15.20024 | 0.126539 | 0.722048 | 0.787689 |
| shSESN2     | SESN2     | 0.080821 | 14.62455 | 7.360335 | 0.006668 | 0.024004 |
| shTRPM7#1   | TRPM7     | -0.13288 | 14.8739  | 18.39057 | 1.80E-05 | 9.25E-05 |
| shTRPM7#2   | TRPM7     | -0.24783 | 14.66783 | 74.99375 | 4.72E-18 | 5.67E-17 |
| shZAP70#1   | ZAP70     | -0.14383 | 14.17178 | 19.57463 | 9.67E-06 | 5.80E-05 |
| shZAP70#2   | ZAP70     | -0.05783 | 15.04069 | 3.467211 | 0.062597 | 0.173345 |
| shZAP70#3   | ZAP70     | 0.01156  | 14.50116 | 0.149549 | 0.698967 | 0.787689 |

Slope = regression slope

LogCPM = log counts per million

LR = linear regression

Pvalue = calculated probability

FDR = false discovery rate

**Supplementary Table 2. Change in shRNA count over time in HPB-ALL.**

| shRNA       | gene      | slope    | logCPM   | LR       | PValue   | FDR      |
|-------------|-----------|----------|----------|----------|----------|----------|
| shCD19#1    | CD19      | -0.02494 | 14.61324 | 0.360766 | 0.548081 | 0.563741 |
| shCD19#2    | CD19      | 0.322201 | 14.00891 | 15.24878 | 9.42E-05 | 0.000261 |
| shCD3e#1    | CD3e      | 0.074454 | 14.68732 | 0.737249 | 0.390543 | 0.438663 |
| shCD3e#2    | CD3e      | -0.02839 | 14.99087 | 0.530497 | 0.466398 | 0.493833 |
| shCD3e#3    | CD3e      | 0.110724 | 14.81066 | 5.815661 | 0.015884 | 0.028591 |
| shDDB2      | DDB2      | -0.07671 | 15.54087 | 4.91949  | 0.026555 | 0.043454 |
| shERGIC3    | ERGIC3    | 0.149835 | 14.66639 | 8.681668 | 0.003214 | 0.00609  |
| shFLG       | FLG       | -0.03314 | 15.809   | 0.840896 | 0.359141 | 0.417067 |
| shFYN#1     | FYN       | -0.1067  | 14.72682 | 8.761949 | 0.003076 | 0.00609  |
| shFYN#2     | FYN       | -0.1498  | 15.14792 | 10.77279 | 0.00103  | 0.002181 |
| shFYN#3     | FYN       | 0.052444 | 14.53822 | 1.91671  | 0.16622  | 0.213711 |
| shKLHL7     | KLHL7     | 0.094138 | 14.73021 | 3.918114 | 0.047768 | 0.068787 |
| shLAT#1     | LAT       | -0.07844 | 14.33617 | 4.559337 | 0.03274  | 0.04911  |
| shLAT#2     | LAT       | 0.448203 | 13.41074 | 82.51448 | 1.05E-19 | 9.44E-19 |
| shLAT#3     | LAT       | -0.08526 | 14.49881 | 3.410346 | 0.064789 | 0.089708 |
| shLCK#1     | LCK       | -0.12064 | 14.80174 | 10.8718  | 0.000976 | 0.002181 |
| shLCK#2     | LCK       | -0.16964 | 15.37185 | 20.91965 | 4.79E-06 | 1.57E-05 |
| shLCK#3     | LCK       | -0.30854 | 14.80821 | 71.77447 | 2.41E-17 | 1.74E-16 |
| shNTC       | NTC       | 0.142722 | 14.67407 | 16.20187 | 5.69E-05 | 0.000171 |
| shPTCRA#1   | PTCRA     | 1.162686 | 12.44823 | 97.1251  | 6.51E-23 | 1.17E-21 |
| shPTCRA#2   | PTCRA     | -0.09302 | 14.33642 | 5.450512 | 0.019563 | 0.033536 |
| shPTCRA#3   | PTCRA     | 0.045001 | 14.68605 | 1.3185   | 0.250862 | 0.301034 |
| shPTEN#1    | PTEN      | 0.192277 | 15.38286 | 23.49149 | 1.25E-06 | 4.52E-06 |
| shPTEN#2    | PTEN      | 0.360431 | 15.34098 | 60.10506 | 8.99E-15 | 4.62E-14 |
| shPTEN#3    | PTEN      | 0.324605 | 15.09946 | 68.71281 | 1.14E-16 | 6.83E-16 |
| shRPL9#1    | RPL9      | -1.21206 | 13.30871 | 93.49248 | 4.08E-22 | 4.89E-21 |
| shRPL9#2    | RPL9      | -0.54714 | 14.65503 | 57.88878 | 2.77E-14 | 1.25E-13 |
| shRPS29#1   | RPS29     | -0.1659  | 15.04966 | 12.06883 | 0.000513 | 0.001231 |
| shRPS29#2   | RPS29     | 1.390155 | 11.19096 | 116.9687 | 2.92E-27 | 1.05E-25 |
| shRUNX1/ETC | RUNX1/ETC | -0.05371 | 15.45031 | 2.394155 | 0.12179  | 0.162386 |
| shSESN2     | SESN2     | 0.05198  | 14.32832 | 0.702013 | 0.402108 | 0.438663 |
| shTRPM7#1   | TRPM7     | -0.07996 | 15.19215 | 4.631726 | 0.031386 | 0.04911  |
| shTRPM7#2   | TRPM7     | -0.01993 | 14.77305 | 0.300749 | 0.583413 | 0.583413 |
| shZAP70#1   | ZAP70     | -0.14588 | 14.20112 | 12.15537 | 0.000489 | 0.001231 |
| shZAP70#2   | ZAP70     | 0.060226 | 15.03983 | 1.719252 | 0.189789 | 0.235601 |
| shZAP70#3   | ZAP70     | 0.307299 | 14.0987  | 40.39811 | 2.07E-10 | 8.29E-10 |

Slope = regression slope

LogCPM = log counts per million

LR = linear regression

Pvalue = calculated probability

FDR = false discovery rate

**Supplementary Table 2. Change in shRNA count over time in MOLT4.**

| shRNA       | gene      | slope    | logCPM   | LR       | PValue   | FDR      |
|-------------|-----------|----------|----------|----------|----------|----------|
| shCD19#1    | CD19      | 0.076676 | 14.63632 | 1.36868  | 0.242039 | 0.484078 |
| shCD19#2    | CD19      | 0.304433 | 14.16582 | 2.526258 | 0.111965 | 0.310058 |
| shCD3e#1    | CD3e      | 0.053084 | 14.7422  | 0.320321 | 0.571415 | 0.734676 |
| shCD3e#2    | CD3e      | 0.000262 | 14.94729 | 1.06E-05 | 0.997398 | 0.997398 |
| shCD3e#3    | CD3e      | 0.097748 | 14.92095 | 1.407473 | 0.235476 | 0.484078 |
| shDDB2      | DDB2      | -0.01769 | 15.59403 | 0.083688 | 0.77236  | 0.896935 |
| shERGIC3    | ERGIC3    | 0.1602   | 14.77733 | 5.377864 | 0.020394 | 0.183544 |
| shFLG       | FLG       | 0.003909 | 15.84047 | 0.005994 | 0.938291 | 0.965099 |
| shFYN#1     | FYN       | 0.007742 | 14.81366 | 0.018907 | 0.890633 | 0.948472 |
| shFYN#2     | FYN       | -0.11644 | 15.07516 | 1.8726   | 0.171178 | 0.38515  |
| shFYN#3     | FYN       | 0.104816 | 14.56482 | 2.537008 | 0.111205 | 0.310058 |
| shKLHL7     | KLHL7     | 0.130125 | 14.88374 | 4.360828 | 0.036774 | 0.231921 |
| shLAT#1     | LAT       | -0.05618 | 14.38549 | 0.709075 | 0.399751 | 0.654138 |
| shLAT#2     | LAT       | 0.420649 | 13.73192 | 2.350098 | 0.125275 | 0.316841 |
| shLAT#3     | LAT       | -0.0557  | 14.45989 | 0.731144 | 0.392513 | 0.654138 |
| shLCK#1     | LCK       | -0.13122 | 14.76446 | 4.085409 | 0.043255 | 0.231921 |
| shLCK#2     | LCK       | -0.16797 | 15.34151 | 3.129431 | 0.076891 | 0.275791 |
| shLCK#3     | LCK       | -0.49393 | 14.57817 | 37.60301 | 8.67E-10 | 3.12E-08 |
| shNTC       | NTC       | 0.214847 | 14.77209 | 2.980575 | 0.084269 | 0.275791 |
| shPTCRA#1   | PTCRA     | 0.267687 | 12.7532  | 0.208158 | 0.648215 | 0.777858 |
| shPTCRA#2   | PTCRA     | -0.19116 | 14.18089 | 7.283953 | 0.006957 | 0.083488 |
| shPTCRA#3   | PTCRA     | -0.03215 | 14.61697 | 0.239374 | 0.624659 | 0.775439 |
| shPTEN#1    | PTEN      | 0.030015 | 15.12332 | 0.320785 | 0.571136 | 0.734676 |
| shPTEN#2    | PTEN      | 0.109527 | 14.80355 | 4.015054 | 0.045096 | 0.231921 |
| shPTEN#3    | PTEN      | 0.037494 | 14.68379 | 0.428577 | 0.512688 | 0.734676 |
| shRPL9#1    | RPL9      | -0.01118 | 14.45504 | 0.023847 | 0.877274 | 0.948472 |
| shRPL9#2    | RPL9      | 0.007072 | 15.13202 | 0.01716  | 0.895779 | 0.948472 |
| shRPS29#1   | RPS29     | -0.32417 | 14.50428 | 13.0007  | 0.000311 | 0.005605 |
| shRPS29#2   | RPS29     | 0.455703 | 11.59586 | 0.554487 | 0.45649  | 0.714506 |
| shRUNX1/ETC | RUNX1/ETC | -0.04558 | 15.46496 | 0.32547  | 0.568339 | 0.734676 |
| shSESN2     | SESN2     | 0.119695 | 14.52444 | 2.268625 | 0.132017 | 0.316841 |
| shTRPM7#1   | TRPM7     | -0.04328 | 15.18369 | 0.357437 | 0.549933 | 0.734676 |
| shTRPM7#2   | TRPM7     | 0.073465 | 14.78222 | 0.850954 | 0.356283 | 0.641309 |
| shZAP70#1   | ZAP70     | -0.06882 | 14.24169 | 1.04734  | 0.30612  | 0.580018 |
| shZAP70#2   | ZAP70     | 0.136615 | 15.01813 | 3.505103 | 0.06118  | 0.27531  |
| shZAP70#3   | ZAP70     | 0.347658 | 14.31406 | 3.121749 | 0.077254 | 0.275791 |

Slope = regression slope

LogCPM = log counts per million

LR = linear regression

Pvalue = calculated probability

FDR = false discovery rate

**Supplementary Table 2. Change in shRNA count over time in SUPT1.**

| shRNA       | gene      | slope    | logCPM   | LR       | PValue   | FDR      |
|-------------|-----------|----------|----------|----------|----------|----------|
| shCD19#1    | CD19      | -0.04584 | 14.65114 | 0.636513 | 0.424976 | 0.546398 |
| shCD19#2    | CD19      | 0.12862  | 14.4973  | 5.898472 | 0.015154 | 0.030308 |
| shCD3e#1    | CD3e      | -0.24225 | 14.39331 | 19.64187 | 9.34E-06 | 3.36E-05 |
| shCD3e#2    | CD3e      | -0.14202 | 14.55194 | 6.734616 | 0.009456 | 0.020024 |
| shCD3e#3    | CD3e      | -0.09928 | 14.71464 | 3.841146 | 0.050009 | 0.090017 |
| shDDB2      | DDB2      | 0.08035  | 15.58186 | 2.732132 | 0.098348 | 0.153936 |
| shERGIC3    | ERGIC3    | 0.065503 | 14.82244 | 1.627733 | 0.202017 | 0.28986  |
| shFLG       | FLG       | 0.018123 | 15.83752 | 0.129273 | 0.719188 | 0.809086 |
| shFYN#1     | FYN       | -0.07978 | 14.72385 | 2.471572 | 0.115922 | 0.173883 |
| shFYN#2     | FYN       | 0.027577 | 15.02277 | 0.293038 | 0.58828  | 0.705936 |
| shFYN#3     | FYN       | 0.08937  | 14.62285 | 2.836867 | 0.092124 | 0.150748 |
| shKLHL7     | KLHL7     | 0.162163 | 15.11518 | 8.211222 | 0.004163 | 0.009367 |
| shLAT#1     | LAT       | -0.01131 | 14.34605 | 0.043935 | 0.833974 | 0.857802 |
| shLAT#2     | LAT       | 0.273    | 14.31746 | 14.00058 | 0.000183 | 0.000598 |
| shLAT#3     | LAT       | -0.04232 | 14.63143 | 0.364078 | 0.54625  | 0.678104 |
| shLCK#1     | LCK       | -0.34628 | 14.26935 | 25.45437 | 4.53E-07 | 2.04E-06 |
| shLCK#2     | LCK       | -0.06171 | 15.14572 | 1.575962 | 0.209343 | 0.28986  |
| shLCK#3     | LCK       | -0.61735 | 13.94143 | 52.16641 | 5.10E-13 | 6.12E-12 |
| shNTC       | NTC       | 0.062558 | 15.05358 | 1.325919 | 0.249533 | 0.33271  |
| shPTCRA#1   | PTCRA     | -0.07778 | 12.83142 | 0.260297 | 0.609916 | 0.70829  |
| shPTCRA#2   | PTCRA     | -0.54271 | 13.57462 | 46.17613 | 1.08E-11 | 9.73E-11 |
| shPTCRA#3   | PTCRA     | -0.35518 | 14.13973 | 12.15597 | 0.000489 | 0.001258 |
| shPTEN#1    | PTEN      | 0.289544 | 15.57128 | 20.91663 | 4.80E-06 | 1.92E-05 |
| shPTEN#2    | PTEN      | 0.282258 | 15.35395 | 35.02909 | 3.25E-09 | 2.34E-08 |
| shPTEN#3    | PTEN      | 0.424263 | 15.38662 | 32.73342 | 1.06E-08 | 6.34E-08 |
| shRPL9#1    | RPL9      | -0.55786 | 13.85047 | 67.01331 | 2.70E-16 | 4.85E-15 |
| shRPL9#2    | RPL9      | -0.18126 | 14.89238 | 12.83435 | 0.00034  | 0.001021 |
| shRPS29#1   | RPS29     | -0.53123 | 14.29437 | 72.14488 | 2.00E-17 | 7.20E-16 |
| shRPS29#2   | RPS29     | 0.628086 | 12.66522 | 8.708742 | 0.003167 | 0.007601 |
| shRUNX1/ETC | RUNX1/ETC | 0.012942 | 15.29902 | 0.067097 | 0.795612 | 0.842413 |
| shSESN2     | SESN2     | 0.129881 | 14.83796 | 5.430274 | 0.019791 | 0.037498 |
| shTRPM7#1   | TRPM7     | -0.00974 | 15.0676  | 0.025845 | 0.87228  | 0.87228  |
| shTRPM7#2   | TRPM7     | -0.19066 | 14.65694 | 12.51527 | 0.000404 | 0.001118 |
| shZAP70#1   | ZAP70     | -0.37416 | 13.77377 | 31.02042 | 2.55E-08 | 1.31E-07 |
| shZAP70#2   | ZAP70     | 0.02048  | 15.15053 | 0.069517 | 0.792042 | 0.842413 |
| shZAP70#3   | ZAP70     | 0.121387 | 14.66767 | 3.03661  | 0.081406 | 0.139553 |

Slope = regression slope

LogCPM = log counts per million

LR = linear regression

Pvalue = calculated probability

FDR = false discovery rate

**Supplementary Table 3. Change in shRNA count over time in PDX L963 in vivo BM.**

| shRNA       | logFC    | logCPM   | LR       | PValue   | FDR      |
|-------------|----------|----------|----------|----------|----------|
| shLCK#3     | -8.57718 | 12.38082 | 26.24361 | 3.01E-07 | 1.08E-05 |
| shRPL9#1    | -6.49117 | 11.56515 | 9.817988 | 0.001728 | 0.031106 |
| shCD19#2    | -3.25763 | 12.52308 | 6.059984 | 0.013828 | 0.160969 |
| shERGIC3    | 4.058343 | 16.74306 | 5.607333 | 0.017885 | 0.160969 |
| shPTEN#1    | -2.94281 | 16.29354 | 3.816812 | 0.050741 | 0.365333 |
| shPTEN#3    | -2.59947 | 12.77494 | 3.110715 | 0.077779 | 0.390707 |
| shLAT#3     | -2.39486 | 13.02144 | 3.075171 | 0.079496 | 0.390707 |
| shLAT#2     | -1.92967 | 12.92357 | 2.9323   | 0.086824 | 0.390707 |
| shPTCRA#2   | 1.95272  | 16.3038  | 1.774488 | 0.182828 | 0.731311 |
| shKLHL7     | -1.47015 | 14.4175  | 1.514979 | 0.218381 | 0.762553 |
| shFYN#1     | -1.3497  | 13.22957 | 1.422439 | 0.233002 | 0.762553 |
| shDDB2      | 1.461431 | 16.93928 | 1.028954 | 0.310405 | 0.906671 |
| shCD3E#2    | -1.28722 | 13.91845 | 0.959119 | 0.327409 | 0.906671 |
| shCD3E#3    | -1.04132 | 14.28719 | 0.636985 | 0.424805 | 0.922599 |
| shZAP70#3   | 1.02018  | 14.20344 | 0.618771 | 0.431504 | 0.922599 |
| shSESN2     | -0.82483 | 14.09281 | 0.494419 | 0.481963 | 0.922599 |
| shLCK#2     | 0.795998 | 15.19829 | 0.363831 | 0.546386 | 0.922599 |
| shRUNX1/ETO | -0.78189 | 13.95386 | 0.338049 | 5.61E-01 | 9.23E-01 |
| shZAP70#2   | -0.53391 | 14.9653  | 0.236764 | 0.626553 | 0.922599 |
| shTRPM7#1   | -0.6809  | 16.76503 | 0.20726  | 0.648923 | 0.922599 |
| shNTC       | 0.408758 | 14.50807 | 0.155089 | 0.693718 | 0.922599 |
| shLCK#1     | 0.737421 | 14.11903 | 0.153269 | 0.695431 | 0.922599 |
| shCD19#1    | 0.678317 | 15.03059 | 0.145387 | 0.702983 | 0.922599 |
| shZAP70#1   | -0.68116 | 13.5309  | 0.126603 | 0.721981 | 0.922599 |
| shFYN#3     | 0.510772 | 14.69092 | 0.11697  | 0.732345 | 0.922599 |
| shRPS29#1   | -0.44438 | 14.52556 | 0.095859 | 0.756857 | 0.922599 |
| shRPL9#2    | 0.47237  | 14.19795 | 0.091172 | 0.762693 | 0.922599 |
| shFLG       | -0.37716 | 15.06153 | 0.081228 | 0.775641 | 0.922599 |
| shFYN#2     | -0.41495 | 14.25891 | 0.079526 | 0.777941 | 0.922599 |
| shLAT#1     | 0.35956  | 15.05768 | 0.050328 | 0.822494 | 0.922599 |
| shPTCRA#3   | -0.26426 | 13.87086 | 0.047526 | 0.827426 | 0.922599 |
| shTRPM7#2   | -0.26199 | 14.70756 | 0.03781  | 0.845825 | 0.922599 |
| shPTEN#2    | -0.24905 | 14.2727  | 0.027004 | 0.869473 | 0.922599 |
| shPTCRA#1   | -0.2584  | 12.41615 | 0.026229 | 0.871343 | 0.922599 |
| shCD3E#1    | 0.050404 | 15.02011 | 0.001907 | 0.965171 | 0.965706 |
| shRPS29#2   | 0.08799  | 10.95056 | 0.001849 | 0.965706 | 0.965706 |

LogFC = log fold change

LogCPM = log counts per million

LR = linear regression

Pvalue = calculated probability

FDR = false discovery rate

**Supplementary Table 3. Change in shRNA count over time in PDX L963 in vivo spleen.**

| shRNA       | logFC    | logCPM   | LR       | PValue   | FDR      |
|-------------|----------|----------|----------|----------|----------|
| shLCK#3     | -8.03321 | 12.38082 | 31.3336  | 2.17E-08 | 7.82E-07 |
| shRPL9#1    | -6.10375 | 11.56515 | 10.30905 | 0.001324 | 0.023828 |
| shCD19#2    | -3.204   | 12.52308 | 5.983788 | 0.014438 | 0.173256 |
| shFYN#1     | -1.84535 | 13.22957 | 3.100858 | 0.078251 | 0.70426  |
| shPTEN#3    | -2.03758 | 12.77494 | 2.452733 | 0.11732  | 0.844707 |
| shERGIC3    | 2.276879 | 16.74306 | 2.167813 | 0.140927 | 0.845559 |
| shPTEN#1    | -1.68258 | 16.29354 | 1.21885  | 0.269586 | 0.97833  |
| shZAP70#1   | -1.7052  | 13.5309  | 1.21095  | 0.271144 | 0.97833  |
| shRUNX1/ETO | -1.24494 | 13.95386 | 1.073682 | 0.300115 | 0.97833  |
| shSESN2     | -1.19801 | 14.09281 | 0.952131 | 0.329178 | 0.97833  |
| shLAT#3     | -1.22223 | 13.02144 | 0.900891 | 0.342543 | 0.97833  |
| shPTCRA#2   | 1.322231 | 16.3038  | 0.800911 | 0.370821 | 0.97833  |
| shKLHL7     | -1.08219 | 14.4175  | 0.763621 | 0.382198 | 0.97833  |
| shCD3E#2    | -1.11341 | 13.91845 | 0.727283 | 0.393765 | 0.97833  |
| shLAT#1     | 1.335508 | 15.05768 | 0.68568  | 0.407638 | 0.97833  |
| shLAT#2     | -0.97306 | 12.92357 | 0.572829 | 0.449137 | 0.983201 |
| shCD19#1    | 1.115446 | 15.03059 | 0.441655 | 0.506325 | 0.983201 |
| shCD3E#3    | -0.60982 | 14.28719 | 0.219188 | 0.63966  | 0.983201 |
| shDDB2      | 0.588038 | 16.93928 | 0.207383 | 0.648827 | 0.983201 |
| shFYN#3     | 0.565636 | 14.69092 | 0.16716  | 0.682649 | 0.983201 |
| shNTC       | 0.412178 | 14.50807 | 0.165008 | 0.684587 | 0.983201 |
| shLCK#1     | -0.76202 | 14.11903 | 0.157834 | 0.691159 | 0.983201 |
| shCD3E#1    | -0.43304 | 15.02011 | 0.143895 | 0.704439 | 0.983201 |
| shFYN#2     | -0.49307 | 14.25891 | 0.119843 | 0.729204 | 0.983201 |
| shFLG       | -0.38268 | 15.06153 | 0.093593 | 0.759658 | 0.983201 |
| shPTCRA#1   | -0.34852 | 12.41615 | 0.050705 | 0.821841 | 0.983201 |
| shTRPM7#1   | 0.316594 | 16.76503 | 0.044782 | 0.832406 | 0.983201 |
| shPTCRA#3   | -0.23218 | 13.87086 | 0.042135 | 0.837362 | 0.983201 |
| shZAP70#2   | 0.20482  | 14.9653  | 0.0318   | 0.858466 | 0.983201 |
| shTRPM7#2   | -0.15276 | 14.70756 | 0.012512 | 0.910937 | 0.983201 |
| shPTEN#2    | 0.157617 | 14.2727  | 0.011548 | 0.914423 | 0.983201 |
| shLCK#2     | 0.12677  | 15.19829 | 0.010496 | 0.918399 | 0.983201 |
| shRPL9#2    | -0.12975 | 14.19795 | 0.008017 | 0.928657 | 0.983201 |
| shZAP70#3   | 0.053671 | 14.20344 | 0.001976 | 0.964547 | 0.983201 |
| shRPS29#1   | 0.037446 | 14.52556 | 0.000707 | 0.978787 | 0.983201 |
| shRPS29#2   | -0.04447 | 10.95056 | 0.000443 | 0.983201 | 0.983201 |

LogFC = log fold change

LogCPM = log counts per million

LR = linear regression

Pvalue = calculated probability

FDR = false discovery rate



**Supplementary Table 3. Change in shRNA count over time in PDX LK203 ex vivo.**

| shRNA       | logFC    | logCPM   | LR       | PValue   | FDR      |
|-------------|----------|----------|----------|----------|----------|
| shRPL9#2    | -2.34442 | 14.34755 | 57.47394 | 3.42E-14 | 1.23E-12 |
| shRPS29#1   | -3.28914 | 13.91702 | 18.12502 | 2.07E-05 | 0.0003   |
| shSESN2     | 1.058582 | 14.68708 | 17.23154 | 3.31E-05 | 0.0003   |
| shERGIC3    | 1.769788 | 15.65966 | 17.22071 | 3.33E-05 | 0.0003   |
| shPTEN#3    | 0.97378  | 15.07812 | 15.42601 | 8.58E-05 | 0.000618 |
| shLCK#1     | -0.77115 | 14.55244 | 10.42664 | 0.001242 | 0.007453 |
| shLAT#1     | -0.79255 | 14.38541 | 10.03618 | 1.53E-03 | 0.007894 |
| shZAP70#3   | 0.913031 | 14.12767 | 8.893602 | 0.002862 | 0.012878 |
| shLCK#2     | -0.67921 | 15.12368 | 7.527476 | 0.006076 | 0.022739 |
| shLAT#3     | -0.81492 | 14.37636 | 7.457751 | 0.006316 | 0.022739 |
| shRPL9#1    | -1.72479 | 13.97955 | 5.985659 | 0.014423 | 0.047201 |
| shLCK#3     | -0.65503 | 15.0903  | 5.812054 | 0.015917 | 0.04775  |
| shPTEN#2    | 0.577326 | 15.27768 | 4.590465 | 0.03215  | 0.086249 |
| shTRPM7#2   | -0.69319 | 14.87496 | 4.517927 | 0.033541 | 0.086249 |
| shCD19#2    | 0.563898 | 14.21015 | 3.744642 | 0.052977 | 0.122818 |
| shPTEN#1    | 0.513298 | 14.97789 | 3.6947   | 0.054586 | 0.122818 |
| shTRPM7#1   | 0.619672 | 15.45041 | 3.558532 | 0.05924  | 0.12545  |
| shPTCRA#3   | -0.53497 | 14.5679  | 3.154093 | 0.075737 | 0.151474 |
| shNTC       | 0.43134  | 14.77022 | 2.861392 | 0.090729 | 0.171907 |
| shFYN#1     | -0.45909 | 14.66029 | 2.5511   | 0.110218 | 0.198392 |
| shPTCRA#2   | -0.94997 | 14.01477 | 2.396064 | 0.121641 | 0.208527 |
| shCD3E#3    | 0.350878 | 14.81547 | 2.265706 | 0.132266 | 0.216245 |
| shFYN#2     | -0.36781 | 15.08274 | 2.198372 | 0.138157 | 0.216245 |
| shCD3E#2    | 0.363319 | 15.12521 | 1.809009 | 0.178627 | 0.267941 |
| shPTCRA#1   | 0.764157 | 13.1688  | 1.504773 | 2.20E-01 | 0.316711 |
| shCD3E#1    | 0.284976 | 14.5903  | 1.312212 | 0.251995 | 0.343891 |
| shRPS29#2   | 0.792341 | 10.99167 | 1.273523 | 2.59E-01 | 3.44E-01 |
| shKLHL7     | 0.278821 | 14.20479 | 1.229674 | 2.67E-01 | 0.343891 |
| shRUNX1/ETO | -0.26394 | 15.47563 | 1.101449 | 0.293948 | 0.364901 |
| shDDB2      | -0.24191 | 15.4647  | 0.99148  | 0.319381 | 0.383257 |
| shZAP70#1   | -0.2403  | 14.2102  | 0.766361 | 3.81E-01 | 0.442853 |
| shCD19#1    | 0.151835 | 14.9887  | 0.447914 | 0.503327 | 0.566243 |
| shFYN#3     | 0.134089 | 14.51175 | 0.32771  | 0.567011 | 0.618557 |
| shLAT#2     | 0.173499 | 13.50733 | 0.187032 | 0.665398 | 0.704539 |
| shFLG       | 0.026086 | 15.75399 | 0.011679 | 0.913942 | 0.9148   |
| shZAP70#2   | -0.02632 | 15.0016  | 0.011446 | 0.9148   | 0.9148   |

LogFC = log fold change

LogCPM = log counts per million

LR = linear regression

Pvalue = calculated probability

FDR = false discovery rate

**Supplementary Table 4. Barcode sequences used in library preparation**

| <b>Name</b> | <b>Sequences</b>                                            | <b>Primer Seq</b> | <b>Read</b> |
|-------------|-------------------------------------------------------------|-------------------|-------------|
| 1           | CAAGCAGAAGACGGCATAACGAGATCGTGATATTTATACCATTTTAATTCAGCTTTGT  | CGTGAT            | ATCACG      |
| 2           | CAAGCAGAAGACGGCATAACGAGATACATCGATTTATACCATTTTAATTCAGCTTTGT  | ACATCG            | CGATGT      |
| 3           | CAAGCAGAAGACGGCATAACGAGATGCCTAAATTTATACCATTTTAATTCAGCTTTGT  | GCCTAA            | TTAGGC      |
| 4           | CAAGCAGAAGACGGCATAACGAGATTGGTCAATTTATACCATTTTAATTCAGCTTTGT  | TGGTCA            | TGACCA      |
| 5           | CAAGCAGAAGACGGCATAACGAGATCACTGTATTTATACCATTTTAATTCAGCTTTGT  | CACTGT            | ACAGTG      |
| 6           | CAAGCAGAAGACGGCATAACGAGATATTGGCATTTATACCATTTTAATTCAGCTTTGT  | ATTGGC            | GCCAAT      |
| 7           | CAAGCAGAAGACGGCATAACGAGATGATCTGATTTATACCATTTTAATTCAGCTTTGT  | GATCTG            | CAGATC      |
| 8           | CAAGCAGAAGACGGCATAACGAGATTCAAGTATTTATACCATTTTAATTCAGCTTTGT  | TCAAGT            | ACTTGA      |
| 9           | CAAGCAGAAGACGGCATAACGAGATCTGATCATTTTATACCATTTTAATTCAGCTTTGT | CTGATC            | GATCAG      |
| 10          | CAAGCAGAAGACGGCATAACGAGATAAGCTAATTTATACCATTTTAATTCAGCTTTGT  | AAGCTA            | TAGCTT      |
| 11          | CAAGCAGAAGACGGCATAACGAGATGTAGCCATTTTATACCATTTTAATTCAGCTTTGT | GTAGCC            | GGCTAC      |
| 12          | CAAGCAGAAGACGGCATAACGAGATTACAAGATTTTATACCATTTTAATTCAGCTTTGT | TACAAG            | CTTGTA      |
| 13          | CAAGCAGAAGACGGCATAACGAGATTTGACTATTTTATACCATTTTAATTCAGCTTTGT | TTGACT            | AGTCAA      |
| 14          | CAAGCAGAAGACGGCATAACGAGATGGAACATTTTATACCATTTTAATTCAGCTTTGT  | GGAAC             | AGTTCC      |
| 15          | CAAGCAGAAGACGGCATAACGAGATTGACATATTTTATACCATTTTAATTCAGCTTTGT | TGACAT            | ATGTCA      |
| 16          | CAAGCAGAAGACGGCATAACGAGATGGACGGATTTTATACCATTTTAATTCAGCTTTGT | GGACGG            | CCGTCC      |
| 17          | CAAGCAGAAGACGGCATAACGAGATCTCTACATTTTATACCATTTTAATTCAGCTTTGT | CTCTAC            | GTAGAG      |
| 18          | CAAGCAGAAGACGGCATAACGAGATGCGGACATTTTATACCATTTTAATTCAGCTTTGT | GCGGAC            | GTCCGC      |
| 19          | CAAGCAGAAGACGGCATAACGAGATTTTCACATTTTATACCATTTTAATTCAGCTTTGT | TTTCAC            | GTGAAA      |
| 20          | CAAGCAGAAGACGGCATAACGAGATGTGGCCATTTTATACCATTTTAATTCAGCTTTGT | GTGGCC            | GTGGCC      |
| 21          | CAAGCAGAAGACGGCATAACGAGATCGAAACATTTTATACCATTTTAATTCAGCTTTGT | CGAAAC            | GTTTCG      |
| 22          | CAAGCAGAAGACGGCATAACGAGATCGTACGATTTTATACCATTTTAATTCAGCTTTGT | CGTACG            | CGTACG      |
| 23          | CAAGCAGAAGACGGCATAACGAGATCCACTCATTTTATACCATTTTAATTCAGCTTTGT | CCACTC            | GAGTGG      |
| 24          | CAAGCAGAAGACGGCATAACGAGATGCTACCATTTTATACCATTTTAATTCAGCTTTGT | GCTACC            | GGTAGC      |
| 25          | CAAGCAGAAGACGGCATAACGAGATATCAGTATTTTATACCATTTTAATTCAGCTTTGT | ATCAGT            | ACTGAT      |
| 26          | CAAGCAGAAGACGGCATAACGAGATGCTCATATTTTATACCATTTTAATTCAGCTTTGT | GCTCAT            | ATGAGC      |
| 27          | CAAGCAGAAGACGGCATAACGAGATAGGAATATTTTATACCATTTTAATTCAGCTTTGT | AGGAAT            | ATTCCT      |
| 28          | CAAGCAGAAGACGGCATAACGAGATCTTTTGATTTTATACCATTTTAATTCAGCTTTGT | CTTTTG            | CAAAAAG     |
| 29          | CAAGCAGAAGACGGCATAACGAGATTAGTTGATTTTATACCATTTTAATTCAGCTTTGT | TAGTTG            | CAACTA      |
| 30          | CAAGCAGAAGACGGCATAACGAGATCCGGTGATTTTATACCATTTTAATTCAGCTTTGT | CCGGTG            | CACCGG      |
| 31          | CAAGCAGAAGACGGCATAACGAGATATCGTGATTTTATACCATTTTAATTCAGCTTTGT | ATCGTG            | CACGAT      |

|    |                                                            |        |        |
|----|------------------------------------------------------------|--------|--------|
| 32 | CAAGCAGAAGACGGCATAACGAGATTGAGTGATTTATACCATTTTAATTCAGCTTTGT | TGAGTG | CACTCA |
| 33 | CAAGCAGAAGACGGCATAACGAGATGCGGACATTTATACCATTTTAATTCAGCTTTGT | GCGGAC | GCGGAC |
| 34 | CAAGCAGAAGACGGCATAACGAGATGCCATGATTTATACCATTTTAATTCAGCTTTGT | GCCATG | CATGGC |
| 35 | CAAGCAGAAGACGGCATAACGAGATAAAATGATTTATACCATTTTAATTCAGCTTTGT | AAAATG | CATTTT |
| 36 | CAAGCAGAAGACGGCATAACGAGATTGTTGGATTTATACCATTTTAATTCAGCTTTGT | TGTTGG | CCAACA |
| 37 | CAAGCAGAAGACGGCATAACGAGATATTCCGATTTATACCATTTTAATTCAGCTTTGT | ATTCCG | CGGAAT |
| 38 | CAAGCAGAAGACGGCATAACGAGATAGCTAGATTTATACCATTTTAATTCAGCTTTGT | AGCTAG | CTAGCT |
| 39 | CAAGCAGAAGACGGCATAACGAGATGTATAGATTTATACCATTTTAATTCAGCTTTGT | GTATAG | CTATAC |
| 40 | CAAGCAGAAGACGGCATAACGAGATTCTGAGATTTATACCATTTTAATTCAGCTTTGT | TCTGAG | CTCAGA |
| 41 | CAAGCAGAAGACGGCATAACGAGATGTCGTCATTTATACCATTTTAATTCAGCTTTGT | GTCGTC | GACGAC |
| 42 | CAAGCAGAAGACGGCATAACGAGATCGATTAATTTATACCATTTTAATTCAGCTTTGT | CGATTA | TAATCG |
| 43 | CAAGCAGAAGACGGCATAACGAGATGCTGTAATTTATACCATTTTAATTCAGCTTTGT | GCTGTA | TACAGC |
| 44 | CAAGCAGAAGACGGCATAACGAGATATTATAATTTATACCATTTTAATTCAGCTTTGT | ATTATA | TATAAT |
| 45 | CAAGCAGAAGACGGCATAACGAGATGAATGAATTTATACCATTTTAATTCAGCTTTGT | GAATGA | TCATTC |
| 46 | CAAGCAGAAGACGGCATAACGAGATTCGGGAATTTATACCATTTTAATTCAGCTTTGT | TCGGGA | TCCCGA |
| 47 | CAAGCAGAAGACGGCATAACGAGATCTTCGAATTTATACCATTTTAATTCAGCTTTGT | CTTCGA | TCGAAG |
| 48 | CAAGCAGAAGACGGCATAACGAGATTGCCGAATTTATACCATTTTAATTCAGCTTTGT | TGCCGA | TCGGCA |
| 49 | CAAGCAGAAGACGGCATAACGAGATTAGCGCATTTATACCATTTTAATTCAGCTTTGT | TAGCGC | GCGCTA |
| 50 | CAAGCAGAAGACGGCATAACGAGATGTGTTTATTTATACCATTTTAATTCAGCTTTGT | GTGTTT | AAACAC |
| 51 | CAAGCAGAAGACGGCATAACGAGATCCTTCAATTTATACCATTTTAATTCAGCTTTGT | CCTTCA | TGAAGG |
| 52 | CAAGCAGAAGACGGCATAACGAGATTATGTTATTTATACCATTTTAATTCAGCTTTGT | TATGTT | AACATA |
| 53 | CAAGCAGAAGACGGCATAACGAGATGACGCGATTTATACCATTTTAATTCAGCTTTGT | GACGCG | CGCGTC |
| 54 | CAAGCAGAAGACGGCATAACGAGATTGTATCATTTATACCATTTTAATTCAGCTTTGT | TGTATC | GATACA |
| 55 | CAAGCAGAAGACGGCATAACGAGATCACACCATTTATACCATTTTAATTCAGCTTTGT | CACACC | GGTGTG |
| 56 | CAAGCAGAAGACGGCATAACGAGATTTCTTAATTTATACCATTTTAATTCAGCTTTGT | TTCTTA | TAAGAA |
| 57 | CAAGCAGAAGACGGCATAACGAGATCTCGCTATTTATACCATTTTAATTCAGCTTTGT | CTCGCT | AGCGAG |
| 58 | CAAGCAGAAGACGGCATAACGAGATTAACCGATTTATACCATTTTAATTCAGCTTTGT | TAACCG | CGGTTA |
| 59 | CAAGCAGAAGACGGCATAACGAGATAAAGCTATTTATACCATTTTAATTCAGCTTTGT | AAAGCT | AGCTTT |
| 60 | CAAGCAGAAGACGGCATAACGAGATAGACCAATTTATACCATTTTAATTCAGCTTTGT | AGACCA | TGGTCT |
| 61 | CAAGCAGAAGACGGCATAACGAGATGGGATAATTTATACCATTTTAATTCAGCTTTGT | GGGATA | TATCCC |
| 62 | CAAGCAGAAGACGGCATAACGAGATACGACAATTTATACCATTTTAATTCAGCTTTGT | ACGACA | TGTCGT |
| 63 | CAAGCAGAAGACGGCATAACGAGATGTGGGGATTTATACCATTTTAATTCAGCTTTGT | GTGGGG | CCCCAC |
| 64 | CAAGCAGAAGACGGCATAACGAGATTCGTATATTTATACCATTTTAATTCAGCTTTGT | TCGTAT | ATACGA |

|    |                                                            |        |        |
|----|------------------------------------------------------------|--------|--------|
| 65 | CAAGCAGAAGACGGCATAACGAGATCAAGGGATTTATACCATTTTAATTCAGCTTTGT | CAAGGG | CCCTTG |
| 66 | CAAGCAGAAGACGGCATAACGAGATGCCGGTATTTATACCATTTTAATTCAGCTTTGT | GCCGGT | ACCGGC |
| 67 | CAAGCAGAAGACGGCATAACGAGATCAGTAAATTTATACCATTTTAATTCAGCTTTGT | CAGTAA | TTACTG |
| 68 | CAAGCAGAAGACGGCATAACGAGATAGTTCCATTTATACCATTTTAATTCAGCTTTGT | AGTTCC | GGAACT |
| 69 | CAAGCAGAAGACGGCATAACGAGATAATAACATTTATACCATTTTAATTCAGCTTTGT | AATAAC | GTTATT |
| 70 | CAAGCAGAAGACGGCATAACGAGATACTTTTATTTATACCATTTTAATTCAGCTTTGT | ACTTTT | AAAAGT |
| 71 | CAAGCAGAAGACGGCATAACGAGATTCCTTATTTATACCATTTTAATTCAGCTTTGT  | TCCCTT | AAGGGA |
| 72 | CAAGCAGAAGACGGCATAACGAGATATACTTATTTATACCATTTTAATTCAGCTTTGT | ATACTT | AAGTAT |
| 73 | CAAGCAGAAGACGGCATAACGAGATAGATGTATTTATACCATTTTAATTCAGCTTTGT | AGATGT | ACATCT |
| 74 | CAAGCAGAAGACGGCATAACGAGATAATCGTATTTATACCATTTTAATTCAGCTTTGT | AATCGT | ACGATT |
| 75 | CAAGCAGAAGACGGCATAACGAGATCGGCGTATTTATACCATTTTAATTCAGCTTTGT | CGGCGT | ACGCCG |
| 76 | CAAGCAGAAGACGGCATAACGAGATGAGAGTATTTATACCATTTTAATTCAGCTTTGT | GAGAGT | ACTCTC |
| 77 | CAAGCAGAAGACGGCATAACGAGATGATTCTATTTATACCATTTTAATTCAGCTTTGT | GATTCT | AGAATC |
| 78 | CAAGCAGAAGACGGCATAACGAGATCCCAATATTTATACCATTTTAATTCAGCTTTGT | CCCAAT | ATTGGG |
| 79 | CAAGCAGAAGACGGCATAACGAGATACGCGGATTTATACCATTTTAATTCAGCTTTGT | ACGCGG | CCGCGT |
| 80 | CAAGCAGAAGACGGCATAACGAGATAGGGCGATTTATACCATTTTAATTCAGCTTTGT | AGGGCG | CGCCCT |
| 81 | CAAGCAGAAGACGGCATAACGAGATCTGCAGATTTATACCATTTTAATTCAGCTTTGT | CTGCAG | CTGCAG |
| 82 | CAAGCAGAAGACGGCATAACGAGATAACTTCATTTATACCATTTTAATTCAGCTTTGT | AACTTC | GAAGTT |
| 83 | CAAGCAGAAGACGGCATAACGAGATGGGTGCATTTATACCATTTTAATTCAGCTTTGT | GGGTGC | GCACCC |
| 84 | CAAGCAGAAGACGGCATAACGAGATTCCTGCATTTATACCATTTTAATTCAGCTTTGT | TCCTGC | GCAGGA |
| 85 | CAAGCAGAAGACGGCATAACGAGATCGCGGCATTTATACCATTTTAATTCAGCTTTGT | CGCGGC | GCCGCG |
| 86 | CAAGCAGAAGACGGCATAACGAGATACCGCCATTTATACCATTTTAATTCAGCTTTGT | ACCGCC | GGCGGT |
| 87 | CAAGCAGAAGACGGCATAACGAGATTAATACATTTATACCATTTTAATTCAGCTTTGT | TAATAC | GTATTA |
| 88 | CAAGCAGAAGACGGCATAACGAGATCACGTAATTTATACCATTTTAATTCAGCTTTGT | CACGTA | TACGTG |
| 89 | CAAGCAGAAGACGGCATAACGAGATATGTGAATTTATACCATTTTAATTCAGCTTTGT | ATGTGA | TCACAT |

**Name**

**Sequences**

NGS-F3 AATGATACGGCGACCACCGAGATCTACACTCTTTCCCTACACGACGCTCTTCCGATCTNNNNCATGGACGAGCTGTACAAGT  
 Forward amplification primer

**Supplementary Table 5. Primer sequences.**

| <b>Gene</b> | <b>Seq</b>           |
|-------------|----------------------|
| LCK-F       | CACGCTGCTCATCCGAAATG |
| LCK-R       | ACCAGGTTGTCTTGCAGTGG |
| PTCRA-F     | TGGATGCCTTCACCTATGGC |
| PTCRA-R     | AAGCCTCTCCTGACAGATGC |
| ZAP70-F     | GAACTTTGTGCACCGTGACC |
| ZAP70-R     | CTGAGCGGGCAGTGTAGTAG |
| FYN-F       | TACCCAGGCATGAACAACCG |
| FYN-R       | GTTGGTACTGGGGCTCTGTC |
| GILZ-F      | CATGGAGGTGGCGGTCTA   |
| GILZ-R      | TTACACCGCAGAACCACCAG |

Supplementary Table 6. Patient and cell line characteristics.

| UPN   | Gender | Age (years) | Time-point | White cell count (10E-9/L) | Cytogenetics                                        | Subgroup   | Molecular             |
|-------|--------|-------------|------------|----------------------------|-----------------------------------------------------|------------|-----------------------|
| L809  | Male   | 16          | diagnosis  | 319                        | 46,XY,del(6)(q13q23). Extra RUNX1 signal [11%]      | TAL1       | nk                    |
| L903  | Female | 4           | diagnosis  | nk                         | 46,XX. STIL-TAL1                                    | TAL1       | nk                    |
| L907  | Male   | 12          | diagnosis  | nk                         | 46,XY                                               | TAL2       | nk                    |
| L963  | Male   | 4           | diagnosis  | 104                        | 46,XY,r(5)(p14q23),del(7)(q22)                      | nk         | nk                    |
| L970  | Male   | 11          | diagnosis  | 316                        | t(5;14)(q35;q32) BCL11B-TLX3                        | TLX3       | nk                    |
| LK080 | Male   | 1           | relapse    | 19                         | 46,XY                                               | nk         | nk                    |
| LK203 | Female | 4           | diagnosis  | 760                        | 46,XX                                               | TCRA-LMO2? | Deletion CDKN2A, PTEN |
| LK287 | Male   | 15          | diagnosis  | 272                        | 46,XY,del(6)(q14~16q23). STIL-TAL1. FIP1L1-PDGFR.A. | TAL1       | nk                    |
| LK290 | Male   | 15          | diagnosis  | 75                         | 46,XY. t(11;19)(q23;p13.3) KMT2A-MLLT1              | KMT2A      | nk                    |

nk = not known

| Cell line | Gender | Age (years) | Disease   | ATCC / DSMZ     | Cytogenetics                                   | TCR status | Mutation                | Deletion      |
|-----------|--------|-------------|-----------|-----------------|------------------------------------------------|------------|-------------------------|---------------|
| SUPT1     | Male   | 8           | T-LBL     | CRL 1942        | t(7;9)(q34;q34.3)                              | pTCR+      |                         | CDKN2B        |
|           |        |             | Relapse   |                 | TRB-NOTCH1/TAN1                                | TCRαβ-     |                         | CDKN2A        |
|           |        |             |           |                 | Inv(14)(q11q32)                                |            |                         |               |
| CUTLL1    | Male   | 14          | T-NHL     |                 | TRAD-IGH                                       |            |                         |               |
|           |        |             | Relapse   |                 | t(7;9)(q34;q34)                                | TCRαβ+     | TP53                    |               |
|           |        |             |           |                 | TRB-NOTCH                                      |            |                         |               |
| HPB-ALL   | Male   | 14          | T-ALL     | ACC 483         | t(5;14)(q35;q32.2)                             | TCRαβ+     |                         | IFNB          |
|           |        |             | Diagnosis |                 | HOX11L2/TLX3-BCL11B                            |            |                         | CDKN2B        |
|           |        |             |           |                 | pseudodiploid with 8% polyploidy               |            |                         | CDKN2A        |
| HSB-2     | Male   | 11          | T-ALL     | ACC 435         | t(1;7)(p34;q34)                                | TCRαβ-     | LCK <sup>V28L</sup>     |               |
|           |        |             |           |                 | LCK-TRB                                        |            | LCK <sup>A353V</sup>    |               |
|           |        |             |           |                 | submicroscopic del(1)(p32)                     |            | LCK <sup>P447L</sup>    |               |
|           |        |             |           |                 | STIL-TAL1(SIL-SCL)                             |            | LCK p.232_233insQKP     |               |
|           |        |             |           |                 | pseudodiploid with 4% polyploidy               |            |                         |               |
| MOLT4     | Male   | 19          | T-ALL     | CRL 1582        | hypertetraploid                                | TCRαβ-     | NRAS                    | CDKN2A        |
|           |        |             | Relapse   | ACC 362         |                                                | pTCR+      | TP53                    |               |
|           |        |             |           |                 |                                                |            | PTEN                    |               |
| Jurkat    | Male   | 14          | T-ALL     | TIB 152         | pseudodiploid                                  | TCRαβ+     | TP53 p.T125T            | IFNA          |
|           |        |             | Relapse   |                 |                                                |            | PTEN p.R234fs, p.L247fs | CDKN2B CDKN2A |
|           |        |             |           |                 |                                                |            | LCK p.L251fs            |               |
| MOLT16    | Female | 5           | T-ALL     | ACC 29          | t(8;14)(q24;q11)                               | TCRαβ+     | TP53                    | CDKN2B CDKN2A |
|           |        |             | Relapse   |                 | MYC-TRAD <sub>1</sub>                          |            | PTEN                    |               |
|           |        |             |           |                 | submicroscopic del(1)(p32) SIL-TAL1/SCL fusion |            |                         |               |
|           |        |             |           | near-diploid    |                                                |            |                         |               |
| KOPT-K1   | Male   | 6           | T-NHL     |                 | t(11;14)(p13;q11) LMO2/TTG2-TRD                | TCRαβ-     |                         | CDKN2A        |
| DU.528    | Male   | 16          | T-ALL     | 40625           | t(1;14)(p32;q11)                               | TCRαβ-     |                         |               |
|           |        |             | Diagnosis |                 | TAL1/SCL-TRD                                   |            |                         |               |
| ALLSIL    | Male   | 17          | T-ALL     | ACC 511         | t(10;14)(q24;q11) TLX1/HOX11-TRAD              | TCRαβ-     |                         | IFNA          |
|           |        |             | Relapse   |                 | NUP214-ABL1                                    |            |                         | IFNB          |
|           |        |             |           |                 | hypertetraploid                                |            |                         | CDKN2B        |
|           |        |             |           |                 |                                                |            |                         | CDKN2A        |
| CCRF-CEM  | Female | 3           | T-ALL     | CCL 119         | submicroscopic del(1)(p32)                     | TCRαβ+     | TP53                    | IFNA          |
|           |        |             | Relapse   | ACC 240         | SIL-TAL1/SCL                                   |            | KRAS                    | IFNB          |
|           |        |             |           |                 | t(5;14)(q35.1;q32.2)                           |            |                         | CDKN2A        |
|           |        |             |           |                 | NKX2-5-BCL11B                                  |            |                         |               |
|           |        |             |           | near-tetraploid |                                                |            |                         |               |
